# Supplementary material
Source: publisher figshare collection journal article supplement (https://acs.figshare.com/ndownloader/files/5160757)
Supplement: Supplementary file 1 [file 5160757]

# Efficient Enantioselective Synthesis of Functionalized Tetrahydropyrans by Ru-Catalyzed Asymmetric Ring-Opening/Cross Metathesis (AROM/CM)

Dennis G. Gillingham, Osamu Kataoka, Steven B. Garber and Amir H. Hoveyda\*

*Department of Chemistry, Merkert Chemistry Center, Boston College  
Chestnut Hill, Massachusetts 02467*

## SUPPORTING INFORMATION

**General.** Infrared (IR) spectra were recorded on a Nicolet 210 spectrophotometer,  $\nu_{\text{max}}$  in  $\text{cm}^{-1}$ . Bands are characterized as broad (br), strong (s), medium (m), and weak (w).  $^1\text{H}$  NMR spectra were recorded on a Varian Unity INOVA 400 (400 MHz) spectrometer. Chemical shifts are reported in ppm from tetramethylsilane with the solvent resonance as the internal standard ( $\text{CDCl}_3$ :  $\delta$  7.26 ppm,  $\text{C}_6\text{D}_6$ :  $\delta$  7.35 ppm). Data are reported as follows: chemical shift, multiplicity (s = singlet, d = doublet, t = triplet, q = quartet, br = broad, m = multiplet), coupling constants (Hz), integration, and assignment.  $^{13}\text{C}$  NMR spectra were recorded on a Varian Unity INOVA 400 (100 MHz) spectrometer with complete proton decoupling. Chemical shifts are reported in ppm from tetramethylsilane with the solvent as the internal reference ( $\text{CDCl}_3$ :  $\delta$  77.16 ppm).  $^{19}\text{F}$  NMR spectra were recorded on a Varian Unity INOVA 400 (376 MHz) spectrometer with complete proton decoupling. Chemical shifts are reported in ppm from  $\text{CFCl}_3$  with the solvent as the internal reference. High-resolution mass spectra were recorded at the University of Illinois (Urbana-Champaign, IL) or on a Micromass LCT ESI-MS (positive mode) at the Mass Spectrometry Facility, Boston College. Elemental microanalyses were performed by Robertson Microlit Laboratories (Madison, NJ). Enantiomer ratios were determined by chiral HPLC analysis (Chiral Technologies Chiralpak AS, Chiralpak AD, Chiralcel OJ, Chiralcel OB-H, and Chiralcel OD (0.46 cm x 25 cm)) in comparison with authentic racemic materials, or by  $^1\text{H}$  or  $^{19}\text{F}$  NMR spectroscopy of the derived Mosher esters in comparison with Mosher esters derived from the authentic racemic materials. Optical rotation values were measured on a Rudolph Research Analytical Autopol IV Polarimeter.

**Materials.** Unless otherwise noted, all reactions were carried out with distilled and degassed solvents under an atmosphere of dry  $\text{N}_2$  in oven- (135 °C) and flame-dried

glassware with standard drybox or vacuum-line techniques, and all work-up and purification procedures were carried out with reagent solvents in air. In most instances, solid organometallic compounds were stored under an atmosphere of N<sub>2</sub>; although it has been determined that such precautions are unnecessary to maintain catalyst stability. All reagent solvents were purchased from Doe and Ingalls, unless otherwise noted. Solvents were purified under positive pressure of dry Ar by a modified Innovative Technologies purification system: toluene and benzene were purified through a copper oxide and an alumina column; CH<sub>2</sub>Cl<sub>2</sub> and Et<sub>2</sub>O were purged with Ar and purified by passing them through two alumina columns. THF was purified by distillation from a benzophenone ketyl immediately prior to use. 1,2-Dichloroethane (Lancaster), CDCl<sub>3</sub> (Cambridge Isotope Laboratory, Inc.), triethylamine (Acros), styrene (Aldrich), vinylcyclohexane (Aldrich), *p*-methoxystyrene (Aldrich), *p*-bromostyrene (Aldrich), and *p*-trifluoromethylstyrene (Aldrich) were distilled from CaH<sub>2</sub> under N<sub>2</sub>. MeOH was distilled over Mg under N<sub>2</sub>. Dimethylformamide (Fisher) was stored under N<sub>2</sub> over activated 4Å molecular sieves. K<sub>2</sub>CO<sub>3</sub> was stored in an oven (120 °C). Cl<sub>2</sub>Ru(=CH-*o*-OiPrC<sub>6</sub>H<sub>3</sub>Ph)PCy<sub>3</sub> was prepared as previously described.<sup>1</sup> Cl<sub>2</sub>Ru(=CHC<sub>6</sub>H<sub>5</sub>)(PCy<sub>3</sub>)<sub>2</sub> was purchased from Materia. The following materials were purchased from commercial sources and used as received: EtOH (Fisher), Calcium granules (Aldrich), Ag<sub>2</sub>O (Strem), 0.05 M potassium phosphate monobasic/ sodium hydroxide pH 7 buffer (Fisher), NaI (Aldrich).

Silica gel column chromatography was driven with compressed air and performed with silica gel 60 (230–400 mesh; pH (10% suspension) 6.5–7.0; surface area 500 m<sup>2</sup>/g; pore volume 0.75 ml/g) obtained from TSI Chemical Co. (Cambridge, MA).

### Preparation of iodide catalyst (**1b**).

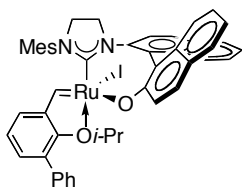

Chloride catalyst **1a** (50.3 mg, 0.0616 mmol) and NaI (97.1 mg, 0.648 mmol) were weighed into a 3 mL Teflon cap vial, THF (1 mL) was added by syringe and the vial was capped and sealed with Teflon tape and electrical tape. The mixture was submerged into a 70 °C oil bath and stirred for 1 h. The THF was removed with a stream of N<sub>2</sub> and the mixture was loaded directly onto a column of silica gel and eluted (1:1 Hex:CH<sub>2</sub>Cl<sub>2</sub>) to deliver **1b** (47.0 mg, 85 %) as a brown solid. X-ray quality crystals were obtained by silica gel chromatography in hexane and diethyl ether (9:1); slow

(1) Van Veldhuizen, J. V.; Gillingham, D. G.; Garber, S. B.; Kataoka, O.; Hoveyda, A. H. *J. Am. Chem. Soc.* **2003**, *125*, 12502–12508.

evaporation of the coloured fractions deliver large crystals after 4–5 days. IR (neat): 3055 (w), 2974 (w), 2917 (w), 1680 (w), 1577 (m), 1470 (m), 1457 (s), 1420 (s), 1281 (s), 910 (m), 734 (s).  $^1\text{H}$  NMR (400 MHz,  $\text{CDCl}_3$ ):  $\delta$  15.57 (s, 1H), 8.14 (dd,  $J = 8.7, 8.7$  Hz, 2H), 7.93 (d,  $J = 8.2$  Hz, 1H), 7.75 (d,  $J = 8.0$  Hz, 1H), 7.63 (d,  $J = 9.0$  Hz, 1H), 7.43 (m, 3H), 7.27–7.07 (m, 9H), 6.99 (s, 1H), 6.93 (ddd,  $J = 8.0, 0.9, 0.9$  Hz, 1H), 6.85–6.83 (m, 2H), 6.79 (d,  $J = 9.0$  Hz, 1H), 4.28–4.18 (m, 2H), 3.93–3.86 (m, 1H), 3.65–3.58 (m, 1H), 3.55–3.47 (m, 1H), 2.44 (s, 3H), 2.29 (s, 3H), 1.82 (s, 3H), 0.56 (d,  $J = 6.3$  Hz, 3H), 0.33 (d,  $J = 6.3$  Hz, 3H).  $^{13}\text{C}$  NMR (100 MHz,  $\text{CDCl}_3$ ):  $\delta$  279.09, 215.03, 169.08, 149.95, 148.20, 139.84, 138.82, 138.33, 138.10, 137.93, 137.58, 137.56, 134.88, 134.74, 133.69, 132.12, 131.61, 130.03, 129.56, 129.30, 128.86, 128.80, 128.64, 128.32, 128.23, 128.19, 127.93, 127.76, 126.74, 126.54, 126.09, 125.18, 124.79, 124.07, 121.65, 120.81, 119.24, 78.29, 53.32, 51.81, 21.49, 20.27, 20.24, 20.10, 18.64. X-ray data is included at the end of this document.

**General procedure A: Ru-Catalyzed AROM/CM in THF at 0.1 M.** **11a** (12.3 mg, 98.0  $\mu\text{mol}$ ) and styrene (46.4 mg, 0.446 mmol) were combined in a dried 3 mL vial containing a stir bar under nitrogen. Catalyst **1b** (3.6 mg, 4.4  $\mu\text{mol}$ ) was dissolved in THF (1 mL) and added by cannula to the vial containing substrate and styrene. The reaction was allowed to stir at 22 °C for 3 h at which point the solvent was removed with a stream of  $\text{N}_2$  and the mixture was loaded onto a silica gel column (0.5 cm W x 8 cm L) and eluted (3:2 Hex:Et<sub>2</sub>O) to deliver recovered catalyst (1.7 mg,  $R_f = 0.5$ , 51%) and the desired product **12** (14.1 mg,  $R_f = 0.2$ , 64%) as a clear colourless oil.

**General procedure B: Ru-Catalyzed AROM/CM in the absence of solvent.** Compound **5c** (10.0 mg, 46.0  $\mu\text{mol}$ ) and distilled vinylcyclohexane (67.2 mg, 0.610 mmol) were combined in a dried 3 mL vial in the glovebox and allowed to stir until all of **5c** dissolved. Catalyst **3** (2.2 mg, 2.4  $\mu\text{mol}$ ) was then weighed directly into the vial. The resulting solution was stirred for 2 h at 22 °C at which point TLC analysis (4:1 Hex:Et<sub>2</sub>O) indicated complete consumption of starting material. The crude mixture was loaded directly onto a silica gel column (0.5 cm W x 8 cm L) and eluted (9:1 Hex:Et<sub>2</sub>O) to deliver bis-cross product (1.4 mg,  $R_f = 0.7$ , 10%), desired product **16** (9.1 mg,  $R_f = 0.5$ , 61%) and recovered catalyst (2.0 mg,  $R_f = 0.3$ , 90%).

**General procedure C: Ru-Catalyzed AROM/CM by slow addition of olefin partner.** Catalyst **1a** (3.7 mg, 5.0  $\mu\text{mol}$ ) and vinylcyclohexane (48.0 mg, 0.436 mmol) were weighed into a dried 3 mL vial containing a stir bar. Substrate **2a** (11.0 mg, 87.0  $\mu\text{mol}$ )

was added slowly by syringe or syringe pump as a solution in dichloroethane over 1 h at 22 °C. The reaction was allowed to stir for an additional 12 h at 22 °C at which time the solvent was removed under a stream of N<sub>2</sub> and the mixture was loaded directly onto a silica gel column (0.5 cm W x 8 cm L) and eluted (2:1 Hex:Et<sub>2</sub>O) to deliver product **9** (14.8 mg, R<sub>f</sub> = 0.3, 72%) as a clear colourless oil.

**(2S,4R,6R)-Tetrahydro-2-(E)-styryl-6-vinyl-2H-pyran-4-ol (4a).**

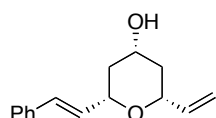

General procedure A was followed with substrate **2a** to afford a colourless oil after silica gel chromatography (3:1 Hex:Et<sub>2</sub>O, R<sub>f</sub> = 0.15). IR (neat): 3370 (br), 3074 (w), 3018 (w), 2955 (m), 2898 (m), 2848 (m), 1646 (m), 1488 (w), 1451 (w), 1362 (m), 1306 (m), 1054 (s), 960 (s), 758 (s), 695 (s). <sup>1</sup>H NMR (400 MHz, CDCl<sub>3</sub>):  $\delta$  7.38–7.19 (m, 5H), 6.62 (d, *J* = 16.0 Hz, 1H), 6.24 (dd, *J* = 16.0, 6.0 Hz, 1H), 5.91 (ddd, *J* = 16.0, 10.8, 6.0 Hz, 1H), 5.30 (dd, *J* = 17.6, 1.2 Hz, 1H), 5.15 (dd, *J* = 10.8, 1.2 Hz, 1H), 4.09–4.05 (m, 1H), 3.97–3.90 (m, 2H), 2.12–2.04 (m, 2H), 1.55 (br s, 1H), 1.44–1.27 (m, 2H). <sup>13</sup>C NMR (100 MHz, CDCl<sub>3</sub>):  $\delta$  138.29, 136.94, 130.84, 129.59, 128.72, 127.86, 126.72, 115.77, 76.45, 76.19, 68.28, 41.31, 40.89. HRMS Calcd for C<sub>15</sub>H<sub>18</sub>O<sub>2</sub>Na: 253.1204. Found: 253.1202. Absolute configuration is determined by conversion to **28** (See S18 & S19 for details).

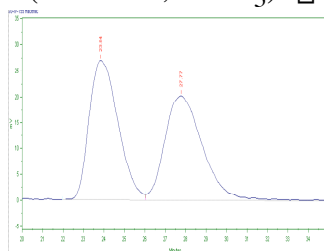

authentic racemic

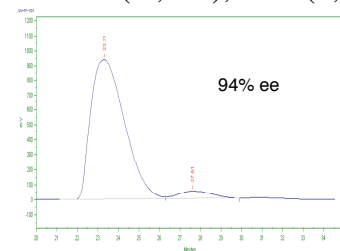

asymmetric reaction with chloride catalyst

conditions: 98:2 Hex:iPA, Chiralpak AS,  
1.0 mL/min, 254 nm  
Retention Times: 23.8 min, 27.8 min

**(2S,4R,6R)-4-Benzyloxytetrahydro-2-(E)-styryl-6-vinyl-2H-pyran (4b).**

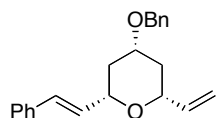

General procedure A was followed with substrate **2b** to afford a colourless oil after silica gel chromatography (40:1 Hex:Et<sub>2</sub>O, R<sub>f</sub> = 0.15). IR (neat): 2922 (m), 2853 (m), 1495 (w), 1451 (w), 1354 (m), 1157 (w), 1071 (s), 966 (m), 747 (s), 695 (s). <sup>1</sup>H NMR (400 MHz, CDCl<sub>3</sub>):  $\delta$  7.42–7.20 (m, 10 H), 6.63 (d, *J* = 16.9 Hz, 1H), 6.26 (dd, *J* = 16.1, 6.0 Hz, 1H), 5.95 (ddd, *J* = 17.2, 10.6, 5.7 Hz, 1H), 5.32 (ddd, *J* = 17.2, 1.5, 1.5

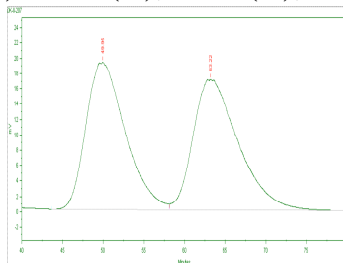

authentic racemic

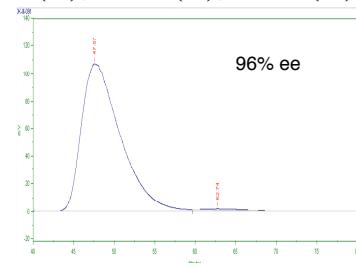

asymmetric reaction with chloride catalyst

conditions: 99.8:0.2 Hex:iPA, Chiralcel OJ,  
1.0 mL/min, 254 nm  
Retention Times: 50.0 min, 53.2 min

Hz, 1H), 5.17 (ddd,  $J = 10.6, 1.5, 1.5$  Hz, 1H), 4.62 (s, 2H), 4.10–4.03 (m, 1H), 3.98–3.91 (m, 1H), 3.71 (dddd,  $J = 11.0, 11.0, 4.6, 4.6$  Hz, 1H), 2.21 (dddd,  $J = 12.5, 4.4, 2.2, 2.2$  Hz, 1H), 2.15 (dddd,  $J = 12.5, 4.4, 2.2, 2.2$  Hz, 1H), 1.48 (ddd,  $J = 11.4, 11.4, 11.4$  Hz, 1H), 1.42 (ddd,  $J = 11.4, 11.4, 11.4$  Hz, 1H).  $^{13}\text{C}$  NMR (100 MHz,  $\text{CDCl}_3$ ):  $\delta$  138.66, 138.39, 136.91, 130.74, 129.70, 128.65, 128.60, 127.77, 127.72, 126.66, 115.65, 76.53, 76.27, 74.54, 69.79, 38.21, 37.83. HRMS Calcd for  $\text{C}_{22}\text{H}_{24}\text{O}_2$ : 320.1776. Found: 320.1767. Absolute configuration is determined by conversion to **4a**.

#### Tetrahydro-4-methoxy-2-(*E*)-styryl-6-vinyl-2*H*-pyran (**4c**).

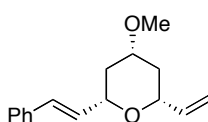

General procedure A was followed with substrate **2c** to afford a colourless oil after silica gel chromatography (20:1 Hex:Et<sub>2</sub>O,  $R_f = 0.14$ ). IR (neat): 2945 (m), 2923 (m), 2848 (m), 2824 (m), 1448 (m), 1379 (m), 1309 (m), 1081 (s), 966 (m), 748 (m), 694 (m).  $^1\text{H}$  NMR

(400 MHz,  $\text{CDCl}_3$ ):  $\delta$  7.42–7.20 (m, 5H), 6.63 (d,  $J = 15.4$  Hz, 1H), 6.26 (dd,  $J = 15.9, 6.0$  Hz, 1H), 5.94 (ddd,  $J = 17.4, 10.6, 5.7$  Hz, 1H), 5.32 (ddd,  $J = 17.4, 1.5, 1.5$  Hz, 1H), 5.17 (ddd,  $J = 10.4, 1.5, 1.5$  Hz, 1H), 4.08 (dddd,  $J = 11.2, 6.1, 1.5, 1.5$  Hz, 1H), 4.00–3.81 (m, 1H), 3.50 (dddd,  $J = 11.0, 11.0, 4.4, 4.4$  Hz,

1H), 3.40 (s, 3H), 2.17 (dddd,  $J = 12.5, 4.4, 2.2, 2.2$  Hz, 1H), 2.12 (dddd,  $J = 12.5, 4.4, 2.2, 2.2$  Hz, 1H), 1.36 (ddd,  $J = 11.4, 11.4, 11.4$  Hz, 1H), 1.30 (ddd,  $J = 11.4, 11.4, 11.4$  Hz, 1H).  $^{13}\text{C}$  NMR (100 MHz,  $\text{CDCl}_3$ ):  $\delta$  138.38, 136.88, 130.72, 129.69, 126.65, 127.77, 126.65, 115.66, 76.60, 76.51, 76.26, 55.57, 37.80, 37.41. HRMS Calcd for  $\text{C}_{16}\text{H}_{20}\text{O}_2$ : 244.1463. Found: 244.1470.

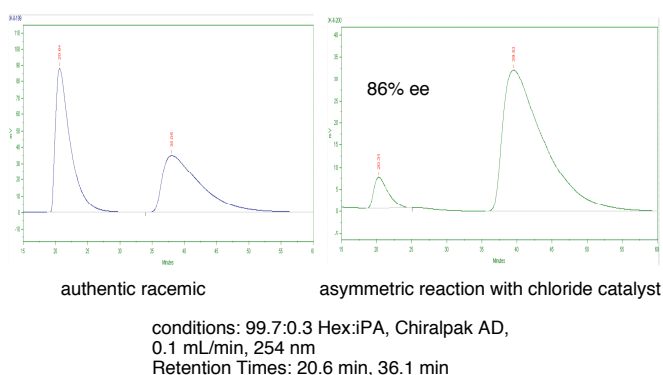

#### (2*S*,4*R*,6*R*)-4-[(*tert*-Butyldimethylsilyl)oxy]tetrahydro-2-styryl-6-vinyl-2*H*-pyran (**4d**).

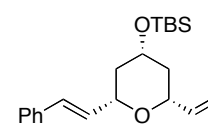

General procedure A was followed with substrate **2d** to afford a colourless oil after silica gel chromatography (50:1 Hex:Et<sub>2</sub>O,  $R_f = 0.15$ ). IR (neat): 2951 (s), 2928 (s), 2856 (s), 1471 (m), 1380 (m), 1255 (m), 1075 (s), 914 (m), 837 (m), 776 (m), 746 (m), 693 (m).  $^1\text{H}$  NMR (400 MHz,  $\text{CDCl}_3$ ):  $\delta$  7.44–7.16 (m, 5H), 6.61 (d,  $J = 15.9$  Hz, 1H), 6.24 (dd,  $J = 15.9, 6.1$  Hz, 1H), 5.92 (ddd,  $J = 17.2, 10.4, 6.0$  Hz, 1H), 5.31 (ddd,  $J = 17.2, 1.5, 1.5$  Hz, 1H), 5.15 (d,  $J =$

10.4 Hz), 4.12–4.01 (m, 1H), 3.99–3.83 (m, 2H), 2.00–1.88 (m, 2H), 1.45 (ddd,  $J = 11.9, 11.9, 11.9$  Hz, 1H), 1.39 (ddd,  $J = 11.9, 11.9, 11.9$  Hz, 1H), 0.90 (s, 9H), 0.09 (s, 6H).  $^{13}\text{C}$  NMR (100 MHz,  $\text{CDCl}_3$ ):  $\delta$  138.51, 136.96, 130.62, 129.85, 128.63, 127.71, 126.64, 115.57, 76.58, 76.30, 68.77, 41.73, 41.32, 25.97, 18.26, –4.35. HRMS Calcd for  $\text{C}_{21}\text{H}_{32}\text{O}_2\text{Si}$ : 344.2172. Found: 344.2167.

Enantiopurity of **4d** was determined by analysis of HPLC of the corresponding alcohol after desilylation. Absolute configuration is determined by conversion to **4a**.

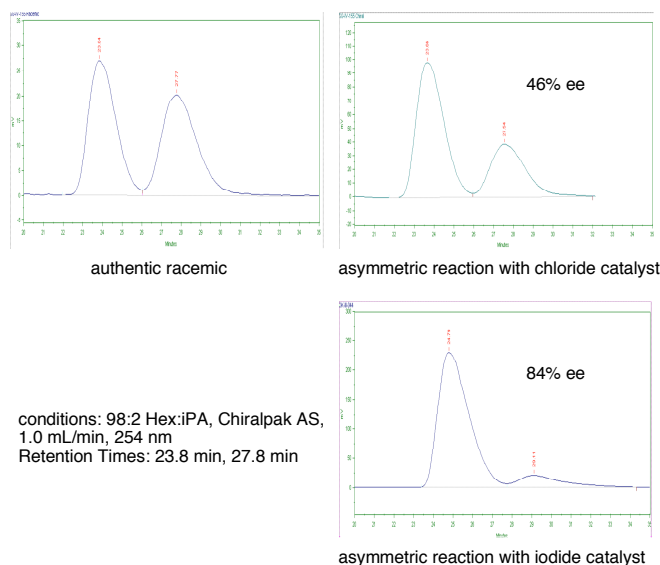

#### Tetrahydro-2-[(*E*)-2-(4-methoxyphenyl)vinyl]-6-vinyl-2H-pyran-4-ol (**5**).

General procedure A was followed with substrate **1a** to afford a colorless oil after silica gel chromatography (3:1 Hex:Et<sub>2</sub>O,  $R_f = 0.15$ ). IR (neat): 3388 (br), 2939 (m), 2920 (m), 1607 (s), 1512 (s), 1301 (m), 1248 (s), 1175 (m), 1063 (m), 1035 (m), 969 (m), 845 (m).  $^1\text{H}$  NMR (400 MHz,  $\text{CDCl}_3$ ):  $\delta$  7.31 (d,  $J = 8.8$  Hz, 2H), 6.84 (d,  $J = 8.8$  Hz, 2H), 6.56 (d,  $J = 15.9$  Hz, 1H), 6.11 (dd,  $J = 15.9, 6.2$  Hz, 1H), 5.92 (ddd,  $J = 17.4, 10.6, 6.0$  Hz, 1H), 5.31 (ddd,  $J = 17.4, 1.1, 1.1$  Hz, 1H), 5.16 (ddd,  $J = 10.6, 1.1, 1.1$  Hz, 1H), 4.05 (dddd,  $J = 11.4, 6.2, 1.1, 1.1$  Hz, 1H), 3.99–3.87 (m, 2H), 3.80 (s, 3H), 2.15–2.00 (m, 2H), 1.71 (br s, 1H), 1.41 (dd,  $J = 11.4, 11.4$  Hz, 1H), 1.32 (dd,  $J = 11.4, 11.4$  Hz, 1H).  $^{13}\text{C}$  NMR (100 MHz,  $\text{CDCl}_3$ ):  $\delta$  159.40, 138.27, 130.42, 129.60, 127.83, 115.68, 114.07, 76.34, 76.32, 68.18,

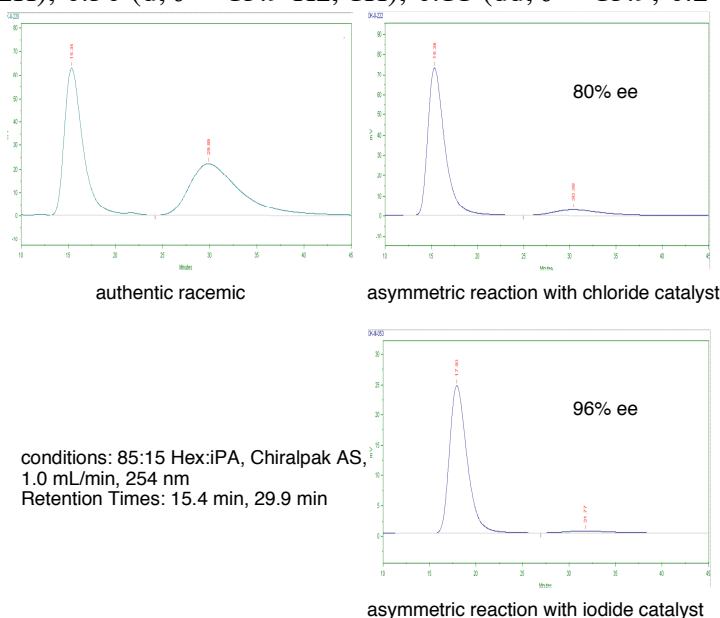

55.40, 41.30, 40.79. HRMS Calcd for  $C_{16}H_{20}O_3Na$ : 283.1310. Found: 283.1304.

**2-[(E)-4-(Trifluoromethyl)styryl]tetrahydro-6-vinyl-2H-pyran-4-ol (6).**

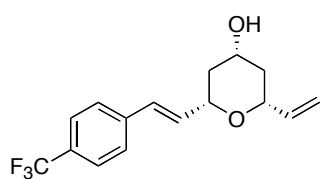

General procedure A was followed with substrate **1a** to afford a colorless oil after silica gel chromatography (3:1 Hex:Et<sub>2</sub>O,  $R_f$  = 0.18). IR (neat): 3387 (br), 2943 (m), 2921 (m), 1615 (m), 1415 (m), 1325 (s), 1165 (s), 1124 (s), 1067 (s), 970 (m), 858 (m). <sup>1</sup>H NMR (400 MHz, CDCl<sub>3</sub>):  $\delta$  7.56 (d,  $J$  = 8.2 Hz, 2H), 7.47 (d,  $J$  = 8.2 Hz, 2H), 6.67 (d,  $J$  = 16.0 Hz, 1H), 6.33 (dd,  $J$  = 16.0, 5.6 Hz, 1H), 5.94 (ddd,  $J$  = 17.3, 10.6, 5.6 Hz, 1H), 5.33 (ddd,  $J$  = 17.3, 1.5, 1.5 Hz, 1H), 5.18 (ddd,  $J$  = 10.6, 1.5, 1.5 Hz, 1H), 4.15–4.07 (m, 1H), 4.01–3.90 (m, 2H), 2.13 (dddd,  $J$  = 12.4, 4.6, 2.2, 2.2 Hz, 1H), 2.08 (dddd,  $J$  = 12.4, 4.6, 2.2, 2.2 Hz, 1H), 1.58 (br s, 1H), 1.40 (ddd,  $J$  = 11.5, 11.5, 11.5 Hz, 1H), 1.36 (ddd,  $J$  = 11.5, 11.5, 11.5 Hz, 1H). <sup>13</sup>C NMR (100 MHz, CDCl<sub>3</sub>):  $\delta$  140.38, 138.05, 132.18, 129.23 (q,  $J$  = 32.4 Hz), 129.17, 126.77, 125.63 (q,  $J$  = 3.8 Hz), 115.85, 76.45, 75.69, 41.05, 40.79. <sup>19</sup>F NMR (376 MHz, CDCl<sub>3</sub>):  $\delta$  -63.01. HRMS Calcd for  $C_{16}H_{17}F_3O_2$ : 298.1181. Found: 298.1174.

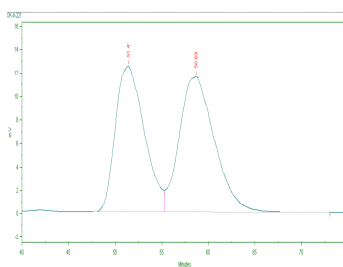

authentic racemic

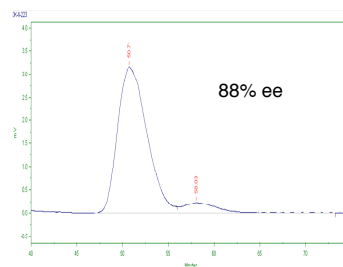

asymmetric reaction with chloride catalyst

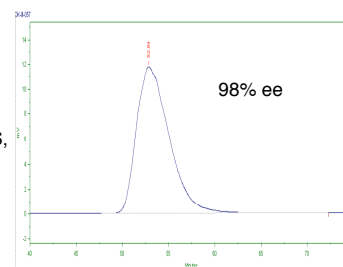

asymmetric reaction with iodide catalyst

Conditions: 99:1 Hex:iPA, Chiralpak AS,  
1.0 mL/min, 254 nm  
Retention Times: 51.4 min, 58.7 min

**2-[(E)-2-(4-Bromophenyl)vinyl]tetrahydro-6-vinyl-2H-pyran-4-ol (7).**

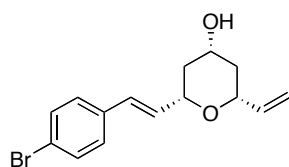

General procedure A was followed with **2a** to afford a colorless solid (mp 85.0–86.0 °C, pentane/Et<sub>2</sub>O) after silica gel chromatography (3:1 Hex:Et<sub>2</sub>O,  $R_f$  = 0.18). IR (neat): 3365 (br), 2935 (m), 2851 (m), 1487 (s), 1403 (m), 1307 (m), 1064 (s), 1008 (m), 963 (m), 808 (m). <sup>1</sup>H NMR (400 MHz, CDCl<sub>3</sub>):  $\delta$  7.45–7.39 (m, 2H), 7.31–7.25 (m, 2H), 6.57 (dd,  $J$  = 15.9, 0.9 Hz, 1H), 6.23 (dd,  $J$  = 15.9, 5.9 Hz, 1H), 5.92 (ddd,  $J$  = 17.4, 10.6, 5.7 Hz, 1H), 5.31 (ddd,  $J$  = 17.4, 1.5, 1.5 Hz, 1H), 5.17 (ddd,  $J$  = 10.6, 1.3, 1.3 Hz, 1H), 4.06 (dddd,  $J$  = 11.2, 5.9, 1.7, 1.7 Hz, 1H),

4.00–3.87 (m, 2H), 2.15–2.01 (m, 2H), 1.67 (br s, 1H), 1.38 (ddd,  $J = 11.4, 11.4, 11.4$  Hz, 1H), 1.34 (ddd,  $J = 11.4, 11.4, 11.4$  Hz, 1H).  $^{13}\text{C}$  NMR (100 MHz,  $\text{CDCl}_3$ ):  $\delta$  138.11, 135.82, 131.77, 130.30, 129.51, 128.16, 121.55, 115.78, 76.41, 75.87, 68.12, 41.10, 40.79. HRMS Calcd for  $\text{C}_{15}\text{H}_{17}\text{BrO}_2$ : 308.0412. Found: 308.0417.

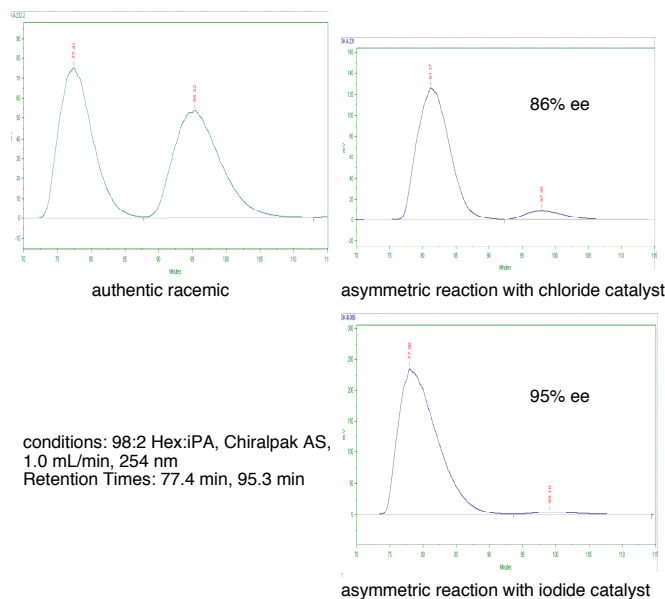

### Tetrahydro-2-[(*E*)-2-(2-methylphenyl)vinyl]-6-vinyl-2*H*-pyran-4-ol (**8**).

General procedure A was followed with substrate **2a** to afford a colorless oil after silica gel chromatography (3:1 Hex:Et<sub>2</sub>O,  $R_f = 0.18$ ). IR (neat): 3388 (br), 2942 (m), 2920 (m), 2852 (m), 1514 (m), 1359 (m), 1309 (m), 1063 (m), 968 (m), 925 (m), 796 (m).  $^1\text{H}$  NMR (400 MHz,  $\text{CDCl}_3$ ):  $\delta$  7.48–7.42 (m, 1H), 7.18–7.10 (m, 3H), 6.84 (dd,  $J = 15.8, 1.1$  Hz, 1H), 6.14 (dd,  $J = 15.8, 6.0$  Hz, 1H), 5.94 (ddd,  $J = 17.2, 10.6, 5.5$  Hz, 1H), 5.33 (ddd,  $J = 17.2, 1.5, 1.5$  Hz, 1H), 5.17 (ddd,  $J = 10.6, 1.5, 1.5$  Hz, 1H), 4.10 (dddd,  $J = 11.4, 6.0, 1.7, 1.7$  Hz, 1H), 4.01–3.89 (m, 2H), 2.35 (s, 3H), 2.12 (dddd,  $J = 12.5, 4.8, 2.2, 2.2$  Hz, 1H), 2.07 (dddd,  $J = 12.5, 4.8, 2.2, 2.2$  Hz, 1H), 1.59 (br s, 1H), 1.42 (ddd,  $J = 11.4, 11.4, 11.4$  Hz, 1H), 1.35 (ddd,  $J = 11.4, 11.4, 11.4$  Hz, 1H).  $^{13}\text{C}$  NMR (100 MHz,  $\text{CDCl}_3$ ):  $\delta$  138.40, 136.03, 135.80, 130.99, 130.48, 128.64, 127.77, 126.31, 125.93, 115.67, 77.47, 76.43,

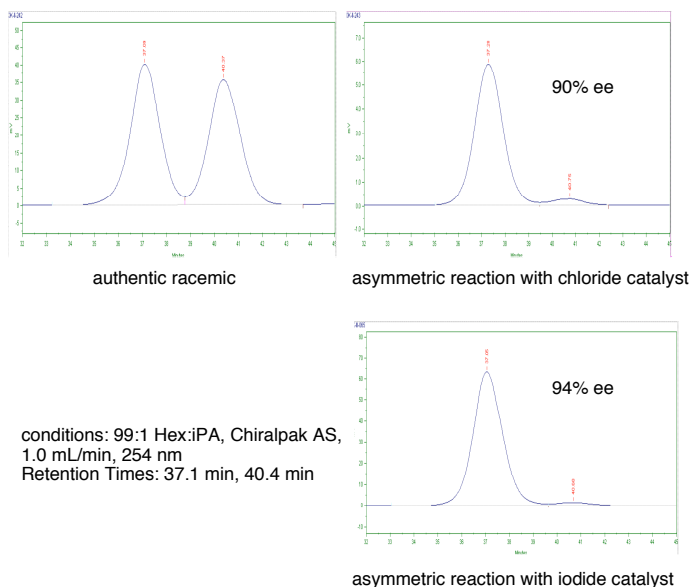



68.35, 41.50, 40.97, 20.02. HRMS Calcd for C<sub>16</sub>H<sub>20</sub>O<sub>2</sub>: 244.1463. Found: 244.1467.

**2-[(*E*)-2-Cyclohexylvinyl]tetrahydro-6-vinyl-2*H*-pyran-4-ol (9).**

General procedure C was followed. IR (neat): 3358 (br), 2917 (s), 2848 (m), 1451 (m), 1067 (m), 960 (m). <sup>1</sup>H NMR (400 MHz, CDCl<sub>3</sub>):  $\delta$  5.90 (ddd, *J* = 16.7, 10.6, 5.5 Hz, 1H), 5.65 (dd, *J* = 15.7, 6.4 Hz, 1H), 5.46 (dd, *J* = 15.7, 6.2 Hz, 1H), 5.27 (d, *J* = 16.7 Hz, 1H), 5.13 (d, *J* = 10.6 Hz, 1H), 3.90–3.83 (m, 3H), 2.03–1.95 (m, 3H), 1.72–1.62 (m, 5H), 1.30–1.01 (m, 8H). <sup>13</sup>C NMR (100 MHz, CDCl<sub>3</sub>):  $\delta$  138.44, 138.27, 127.61, 115.53, 76.45, 76.28, 68.24, 41.45, 40.80, 40.41, 32.79, 26.31, 26.17. HRMS Calcd for C<sub>15</sub>H<sub>24</sub>O<sub>2</sub>Na: 259.1674. Found: 259.1676. The ee for this compound was determined by analysis of the <sup>1</sup>H NMR of the derived Mosher ester (using (*S*)-Mosher's acid).

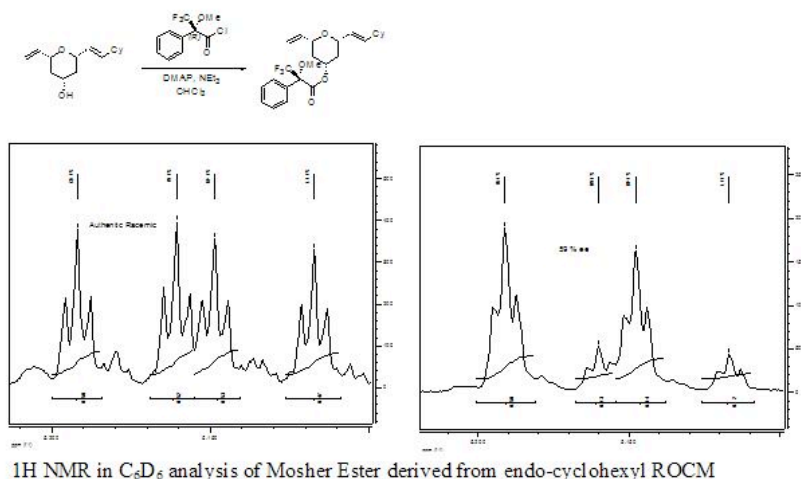

**(2*S*,4*S*,6*R*)-Tetrahydro-2-(*E*)-styryl-6-vinyl-2*H*-pyran-4-ol (12).**

General procedure A was followed with substrate **11a** to afford **12** as a clear colourless oil after silica gel chromatography (1:2 Hex:Et<sub>2</sub>O, *R<sub>f</sub>* = 0.3). IR (neat): 3415 (br), 3024 (w), 2917 (m), 1430 (w), 1300 (m), 1055 (s), 960 (s), 746 (s), 696 (s). <sup>1</sup>H NMR (400 MHz, CDCl<sub>3</sub>):  $\delta$  7.39–7.37 (m, 2H), 7.32–7.28 (m, 2H), 7.24–7.20 (m, 1H), 6.63 (d, *J* = 16.1, 1H), 6.22 (dd, *J* = 16.0, 6.1 Hz, 1H), 5.91 (ddd, *J* = 17.3, 10.6, 5.7 Hz, 1H), 5.32 (ddd, *J* = 17.3, 1.5, 1.5 Hz,

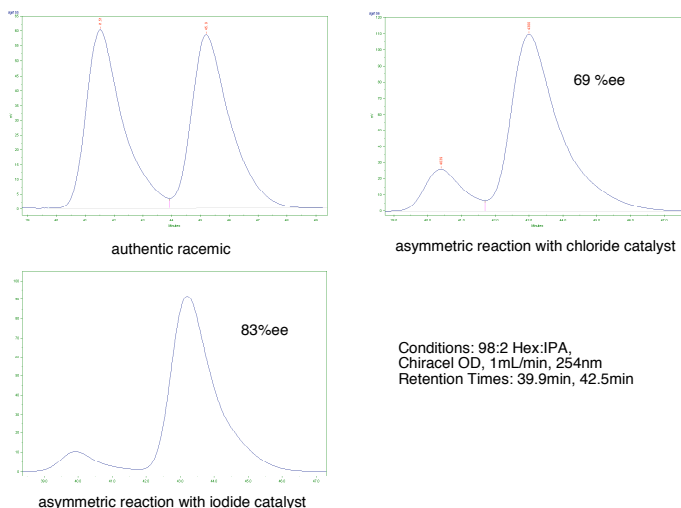

1H), 5.15 (ddd,  $J = 10.6, 1.3, 1.3$  Hz, 1H), 4.59–4.54 (m, 1H), 4.46–4.42 (m, 1H), 4.36–4.35 (m, 1H), 1.83–1.61 (m, 4H).  $^{13}\text{C}$  NMR (100 MHz,  $\text{CDCl}_3$ ):  $\delta$  138.99, 137.05, 130.49, 130.37, 128.61, 127.64, 126.60, 115.41, 72.44, 72.19, 64.57, 38.71, 38.27. HRMS Calcd for  $\text{C}_{15}\text{H}_{18}\text{O}_2$ : 230.1307. Found: 230.1307. Absolute configuration is determined by conversion to **4a**.

**(2S,4S,6R)-4-Benzyloxypyrane-2-styryl-6-vinyl-2H-pyran (13).**

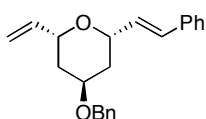

General procedure A was followed with substrate **11a** to afford a colorless oil after silica gel chromatography (14:1 Hex:Et<sub>2</sub>O,  $R_f = 0.4$ ).

IR (neat): 3081 (w), 3024 (w), 2917 (w), 2860 (w), 1501 (w), 1451 (w), 1338 (m), 1067 (s), 966 (m), 690 (s).  $^1\text{H}$  NMR (400 MHz,  $\text{CDCl}_3$ ):  $\delta$  7.41–7.36 (m, 6H), 7.33–7.28 (m, 3H), 7.24–7.20 (m, 1H), 6.62 (d,  $J = 16.0$  Hz, 1H), 6.23 (dd,  $J = 16.0, 6.1$  Hz, 1H), 5.92 (ddd,  $J = 17.3, 10.6, 5.7$  Hz, 1H), 5.32 (ddd,  $J = 17.4, 1.5, 1.5$  Hz, 1H), 5.15 (ddd,  $J = 10.6, 1.4, 1.4$  Hz, 1H), 4.61 (s, 2H), 4.58–4.54 (m, 1H), 4.56–4.41 (m, 1H), 3.97–3.95 (m, 1H), 2.04–1.95 (m, 2H), 1.64–1.51 (m, 2H).  $^{13}\text{C}$  NMR (100 MHz,  $\text{CDCl}_3$ ):  $\delta$  139.17, 138.95, 137.14, 130.59, 130.37, 128.60, 128.58, 127.71, 127.59, 127.53, 126.60, 115.28, 72.93, 72.70, 71.33, 70.40, 35.85, 35.41. HRMS Calcd for  $\text{C}_{22}\text{H}_{24}\text{O}_2\text{Na}$ : 343.1674. Found: 343.1674. Absolute configuration is determined by conversion to **4a**.

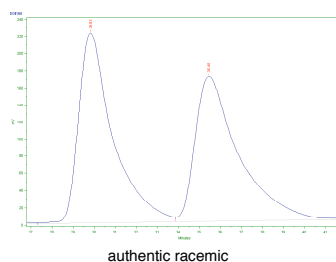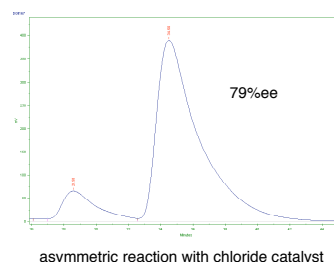

Conditions: 99:1 Hex:IPA, Chiracel AD,  
0.2mL/min, 254nm  
Retention Times: 29.8min, 35.5min

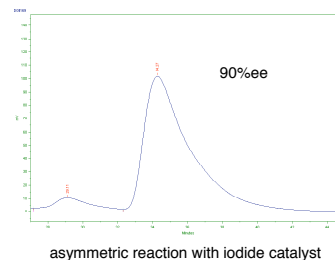

**4-Benzyloxypyrane-2-[(E)-4-(methoxyphenyl)vinyl]-6-vinyl-2H-pyran (14).**

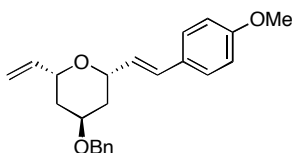

General procedure A was followed with substrate **11b** using the chloride catalyst and general procedure B was followed with **11b** using the iodide catalyst to afford a colorless oil after silica gel chromatography (19:1 Hex:Et<sub>2</sub>O,  $R_f = 0.3$ ). IR (neat): 3024 (w), 2924 (w), 2823 (w), 1608 (m), 1514 (s), 1243 (s), 1174 (m), 1061 (m).  $^1\text{H}$  NMR (400 MHz,  $\text{CDCl}_3$ ):  $\delta$  7.39–7.30 (m, 5H), 7.32 (d,  $J = 8.8$  Hz, 2H), 6.84 (d,  $J = 8.8$  Hz, 2H), 6.56 (d,  $J = 15.9$  Hz, 1H), 6.10 (dd,  $J = 16.0, 6.3$  Hz, 1H), 5.91 (ddd,  $J = 17.3, 10.6,$

5.7 Hz, 1H), 5.31 (ddd,  $J = 17.3$ , 1.6, 1.6 Hz, 1H), 5.14 (ddd,  $J = 10.6$ , 1.5, 1.5 Hz, 1H), 4.60 (s, 2H), 4.55–4.51 (m, 1H), 4.45–4.40 (m, 1H), 3.96–3.94 (m, 1H), 3.80 (s, 3H), 2.03–1.94 (m, 2H), 1.63–1.50 (m, 2H).  $^{13}\text{C}$  NMR (100 MHz,  $\text{CDCl}_3$ ):  $\delta$  159.26, 139.20, 138.95, 130.02, 129.88, 128.55, 128.34, 127.75, 127.67, 127.50, 115.25, 114.02, 72.91, 72.86, 71.34, 70.35, 55.37, 35.86, 35.40. HRMS Calcd for  $\text{C}_{23}\text{H}_{26}\text{O}_3\text{Na}$ : 373.1780. Found: 373.1776.

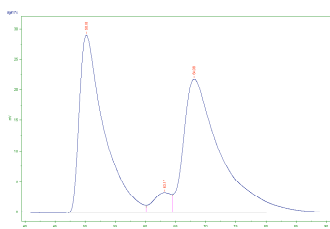

authentic racemic

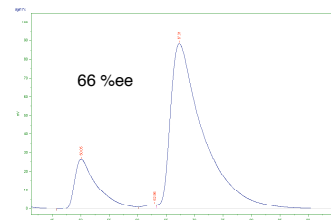

asymmetric reaction using chloride catalyst

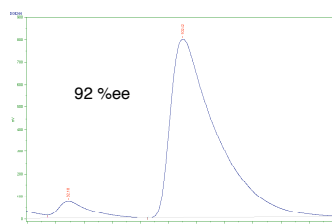

asymmetric reaction using iodide catalyst

Conditions: 99:1 Hex:IPA, Chiracel AD,  
0.2 mL/min, 254 nm  
Retention Times: 50.1min, 67.3min

#### 4-Benzyloxytetrahydro-2-[(*E*)-4-(trifluoromethylphenyl)vinyl]-6-vinyl-2*H*-pyran (15).

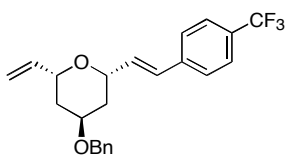

General procedure A was followed with substrate **11b** using the chloride catalyst and general procedure B was followed with substrate **11b** using the iodide catalyst to afford a colorless oil after silica gel chromatography (19:1 Hex:Et<sub>2</sub>O,  $R_f = 0.5$ ). IR

(neat): 3037 (w), 2924 (w), 2861 (w), 1621 (w), 1325 (s), 1168 (m), 1124 (s), 1067 (s).  $^1\text{H}$  NMR (400 MHz,  $\text{CDCl}_3$ ):  $\delta$  7.55 (d,  $J = 8.2$  Hz, 2H), 7.46 (d,  $J = 8.3$  Hz, 2H), 7.39–7.36 (m, 4H), 7.33–7.30 (m, 1H), 6.66 (d,  $J = 16.0$  Hz, 1H), 6.32 (dd,  $J = 16.0$ , 5.7 Hz, 1H), 5.92 (ddd,  $J = 17.3$ , 10.6, 5.7 Hz, 1H), 5.32 (ddd,  $J = 17.3$ , 1.5, 1.5 Hz, 1H), 5.16 (ddd,  $J = 10.6$ , 1.3, 1.3 Hz, 1H), 4.61 (s, 2H), 4.60–4.56 (m, 1H), 4.45–4.41 (m, 1H), 3.98–3.96 (m, 1H), 2.04–1.96 (m, 2H), 1.62–1.50 (m, 2H).  $^{13}\text{C}$  NMR (100 MHz,  $\text{CDCl}_3$ ):  $\delta$  140.87, 139.21, 139.07, 133.53, 129.73, 129.40, 128.97, 128.80, 127.96, 127.74, 126.90, 125.83 (q,  $J = 3.8$  Hz), 115.60, 73.19, 72.53, 71.41, 70.65, 36.00, 35.55. HRMS Calcd for  $\text{C}_{23}\text{H}_{23}\text{O}_2\text{F}_3\text{Na}$ : 411.1548. Found: 411.1553.

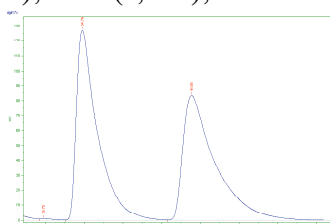

authentic racemic

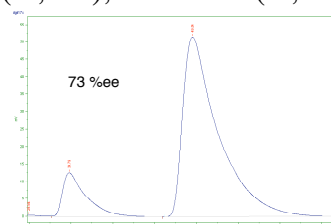

asymmetric reaction with chloride catalyst

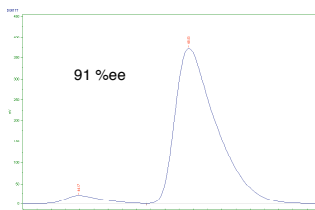

asymmetric reaction with iodide catalyst

Conditions: 99:1 Hex:IPA, Chiracel AD,  
0.2 mL/min, 254 nm  
Retention Times: 34.5min, 48.5min

**4-Benzyloxy-2-[(E)-2-Cyclohexylvinyl]tetrahydro-6-vinyl-2H-pyran (16).**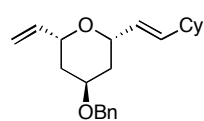

General procedure B was used with **11b** to afford **16** as a colorless oil after silica gel chromatography (19:1 Hex:Et<sub>2</sub>O  $R_f$  = 0.5). IR (neat): 2917 (s), 2848 (m), 1451 (m), 1338 (w), 1061 (s), 966 (m), 702 (w). <sup>1</sup>H NMR (400 MHz, CDCl<sub>3</sub>):  $\delta$  7.38–7.35 (m, 4H), 7.31–7.27 (m, 1H), 5.88 (ddd,  $J$  = 17.3, 10.6, 5.8 Hz, 1H), 5.64 (dd,  $J$  = 15.7, 6.5 Hz, 1H), 5.43 (dd,  $J$  = 15.7, 6.4 Hz, 1H), 5.25 (d,  $J$  = 17.3, 1H), 5.10 (d,  $J$  = 10.6 Hz, 1H), 4.57 (s, 2H), 4.36–4.28 (m, 2H), 3.91–3.89 (m, 1H), 1.93–1.86 (m, 3H), 1.72–1.69 (m, 5H), 1.52–1.45 (m, 2H), 1.27–1.04 (m, 5H). <sup>13</sup>C NMR (100 MHz, CDCl<sub>3</sub>):  $\delta$  139.39, 139.04, 137.92, 128.54, 128.42, 127.64, 127.50, 115.14, 72.92, 72.86, 71.41, 70.28, 40.48, 35.91, 35.39, 32.85, 26.35, 26.21. HRMS Calcd for C<sub>22</sub>H<sub>30</sub>O<sub>2</sub>: 326.2246. Found: 326.2250. The ee was determined by HPLC analysis of the debenzylated alcohol of **16**. Debenzylation was carried out under dissolving metal conditions using calcium.

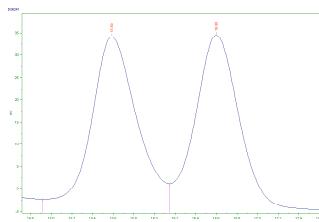

authentic racemic

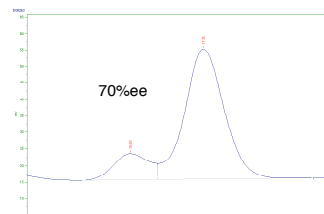

asymmetric reaction using chloride catalyst

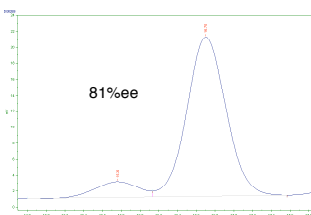

asymmetric reaction using iodide catalyst

Conditions: 98:2 Hex:IPA, Chiralpak AS,  
0.5 mL/min, 210 nm  
Retention Times: 15.8min, 16.7min

**(2S,4S,6R)-4-[(tert-Butyldimethylsilyl)oxy]tetrahydro-2-styryl-6-vinyl-2H-pyran (17).**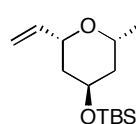

General procedure A was followed with **11d** using chloride catalyst and general procedure B was followed with **11d** using the iodide catalyst to afford a colourless oil after silica gel chromatography (24:1 Hex:Et<sub>2</sub>O,  $R_f$  = 0.3). IR (neat): 3024 (w), 2949 (s), 2923 (s), 2855 (m), 1243 (m), 1092 (s), 1055 (s), 909 (m), 835 (s), 771 (m), 690 (m). <sup>1</sup>H NMR (400 MHz, CDCl<sub>3</sub>):  $\delta$  7.39–7.37 (m, 2H), 7.31–7.28 (m, 2H), 7.23–7.20 (m, 1H), 6.61 (d,  $J$  = 16.0 Hz, 1H), 6.24 (dd,  $J$  = 16.0, 6.0 Hz, 1H), 5.91 (ddd,  $J$  = 16.7, 10.6, 5.6 Hz, 1H), 5.30 (dd,  $J$  = 16.7, 1.0 Hz, 1H), 5.13 (dd,  $J$

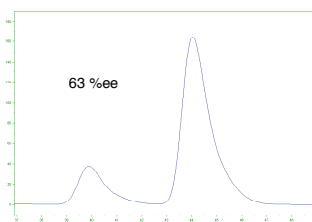

asymmetric reaction with chloride catalyst

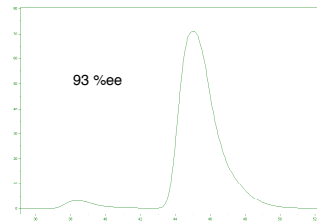

asymmetric reaction with iodide catalyst

= 10.6, 0.9 Hz, 1H), 4.59–4.54 (m, 1H), 4.46–4.42 (m, 1H), 4.28–4.27 (m, 1H), 1.73–1.55 (m, 4H), 0.94 (s, 9H), 0.09 (s, 6H).  $^{13}\text{C}$  NMR (100 MHz,  $\text{CDCl}_3$ ):  $\delta$  139.44, 137.22, 130.90, 130.04, 128.60, 127.53, 126.59, 114.97, 72.57, 72.30, 64.96, 39.50, 39.08, 25.97, 18.23, 14.47. HRMS Calcd for  $\text{C}_{21}\text{H}_{32}\text{O}_2\text{Si}$ : 344.2172. Found: 344.2178.

The enantiomeric excess was determined by deprotection in 10%  $\text{HCl}_{(\text{aq})}$ /THF followed by HPLC using the conditions reported for alcohol **11a**. Absolute configuration is determined by conversion to **4a**.

#### Tetrahydro-4-methyl-2-(*E*)-styryl-6-vinyl-2*H*-pyran-4-ol (**19**).

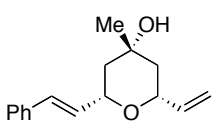 General procedure A was followed with substrate **18** to afford a colourless oil after silica gel chromatography (3:1 Hex:Et<sub>2</sub>O,  $R_f$  = 0.15). IR (neat): 3398 (br), 2971 (m), 2938 (m), 2918 (m), 1376 (m), 1103 (m), 1070 (m), 966 (m), 746 (m), 694 (m).  $^1\text{H}$  NMR (400 MHz,  $\text{CDCl}_3$ ):  $\delta$  7.41–7.20 (m, 5H), 6.63 (d,  $J$  = 15.9 Hz, 1H), 6.22 (d,  $J$  = 15.9, 6.0 Hz, 1H), 5.91 (ddd,  $J$  = 17.2, 10.6, 5.7 Hz, 1H), 5.32 (ddd,  $J$  = 17.2, 1.3, 1.3 Hz, 1H), 5.18 (ddd,  $J$  = 10.6, 1.3, 1.3 Hz, 1H), 4.17–4.06 (m, 1H), 4.03–3.94 (m, 1H), 1.82 (ddd,  $J$  = 12.1, 2.4, 2.4 Hz, 1H), 1.77 (ddd,  $J$  = 12.1, 2.4, 2.4 Hz, 1H), 1.58 (dd,  $J$  = 12.1, 12.1 Hz, 1H), 1.52 (dd,  $J$  = 12.1, 12.1 Hz, 1H), 1.51 (br s, 1H), 1.42 (s, 3H,  $\text{CH}_3$ ).  $^{13}\text{C}$  NMR (100 MHz,  $\text{CDCl}_3$ ):  $\delta$  138.46, 136.88, 130.80, 129.75, 128.65, 127.78, 126.65, 115.71, 75.91, 75.67, 69.40, 46.24, 45.83, 26.01. HRMS Calcd for  $\text{C}_{16}\text{H}_{20}\text{O}_2$ : 244.1463. Found: 244.1460.

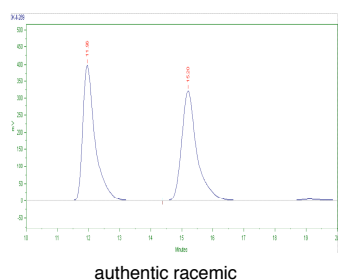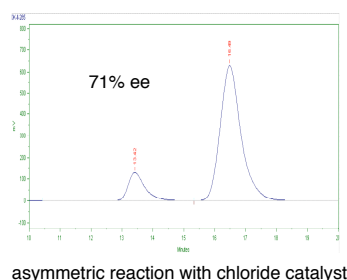

Conditions: 95:5 Hex:iPA, Chiralcel OD,  
1.0 mL/min, 254 nm  
Retention Times: 12.0 min, 15.2 min

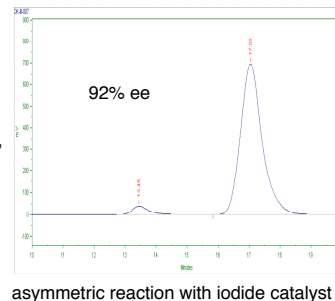

**Tetrahydro-2-[(E)-2-(4-methoxyphenyl)vinyl]-4-methyl-6-vinyl-2H-pyran-4-ol (20).**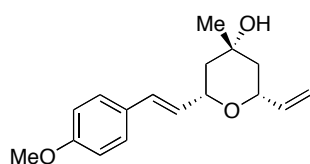

General procedure A was followed with **18** to afford a colourless oil after silica gel chromatography (Hex:Et<sub>2</sub>O = 3:1,  $R_f$  = 0.15). IR (neat): 3413 (br), 2936 (m), 2837 (m), 1607 (m), 1511 (m), 1250 (m), 1175 (m), 1106 (m), 1034 (m), 968 (m), 923 (m), 814 (m). <sup>1</sup>H NMR (400 MHz, CDCl<sub>3</sub>):  $\delta$  7.31 (d,  $J$  = 8.6 Hz, 2H), 6.84 (d,  $J$  = 8.6 Hz, 2H), 6.57 (d,  $J$  = 15.9 Hz, 1H), 6.08 (dd,  $J$  = 15.9, 6.2 Hz, 1H), 5.91 (ddd,  $J$  = 17.2, 10.6, 5.7 Hz, 1H), 5.31 (d,  $J$  = 17.2 Hz, 1H), 5.16 (d,  $J$  = 10.6 Hz, 1H), 4.08 (dd,  $J$  = 11.4, 6.2 Hz, 1H), 3.97 (dd,  $J$  = 11.4, 5.7 Hz, 1H), 3.80 (s, 3H), 1.84–1.72 (m, 2H), 1.63–1.43 (m, 2H), 1.51 (br s, 1H), 1.42 (s, 3H). <sup>13</sup>C NMR (100 MHz, CDCl<sub>3</sub>):  $\delta$  159.41, 138.52, 130.48, 129.63, 127.85, 127.55, 115.71, 114.08, 75.91, 75.88, 69.42, 55.41, 46.33, 45.82, 26.02. HRMS Calcd for C<sub>17</sub>H<sub>22</sub>O<sub>3</sub>: 274.1569. Found: 274.1563.

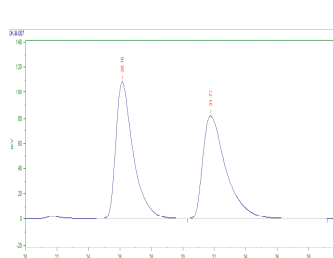

authentic racemic

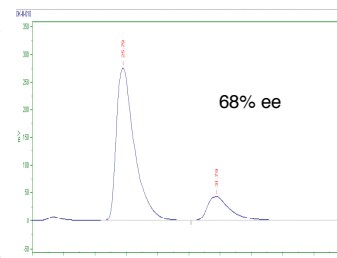

asymmetric reaction with chloride catalyst

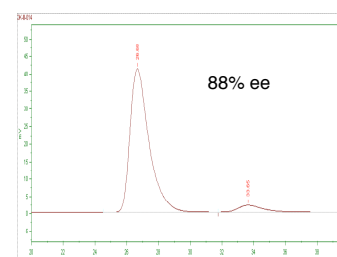

asymmetric reaction with iodide catalyst

conditions: 97:3 Hex:iPA, Chiralcel OD,  
1.0 mL/min, 254 nm  
Retention Times: 26.2 min, 31.8 min

**2-[(E)-2-(4-trifluoromethylphenyl)vinyl]tetrahydro-4-methyl-6-vinyl-2H-pyran-4-ol (21).**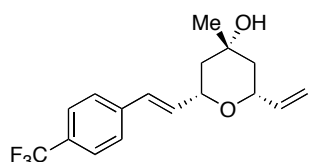

General procedure A was followed with substrate **18** to afford a colorless oil after silica gel chromatography (3:1 Hex:Et<sub>2</sub>O,  $R_f$  = 0.18). IR (neat): 3398 (br), 2938 (m), 2933 (m), 1615 (m), 1378 (m), 1326 (s), 1123 (s), 1067 (s), 969 (m), 817 (m), 597 (m). <sup>1</sup>H NMR (400 MHz, CDCl<sub>3</sub>):  $\delta$  7.56 (d,  $J$  = 8.3 Hz, 2H), 7.46 (d,  $J$  = 8.3 Hz, 2H), 6.67 (d,  $J$  = 16.1 Hz, 1H), 6.31 (dd,  $J$  = 16.1, 5.5 Hz, 1H), 5.91 (ddd,  $J$  = 17.2, 10.6, 5.7 Hz, 1H), 5.33 (ddd,  $J$  = 17.2, 1.5, 1.5 Hz, 1H), 5.18 (ddd,  $J$  = 10.6, 1.5, 1.5 Hz, 1H), 4.14 (dddd,  $J$  = 11.4, 5.5, 1.7, 1.7 Hz, 1H), 3.99 (dddd,  $J$  = 11.7, 5.7, 2.0, 1.1, 1.1 Hz, 1H), 1.83 (ddd,  $J$  = 12.6, 2.4, 2.4 Hz, 1H), 1.78 (ddd,  $J$  = 12.6, 2.4, 2.4 Hz, 1H), 1.62–1.48 (m, 2H), 1.57 (br s, 1H), 1.43 (s, 3H). <sup>13</sup>C NMR (100 MHz, CDCl<sub>3</sub>):  $\delta$  140.43, 138.30, 132.43, 129.20, 126.77, 125.64 (q,  $J$  = 3.8 Hz), 115.85, 76.00,

75.25, 69.35, 46.05, 45.81, 25.99.  $^{19}\text{F}$  NMR (376 MHz,  $\text{CDCl}_3$ ):  $\delta$  -63.01. HRMS Calcd for  $\text{C}_{17}\text{H}_{19}\text{F}_3\text{O}_2$ : 312.1337. Found: 312.1341.

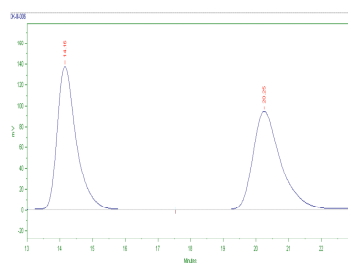

authentic racemic

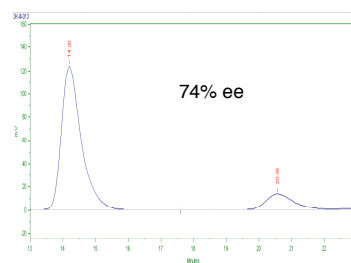

asymmetric reaction with chloride catalyst

conditions: 97:3 Hex:iPA, Chiralcel OD,  
1.0 mL/min, 254 nm  
Retention Times: 14.2 min, 20.3 min

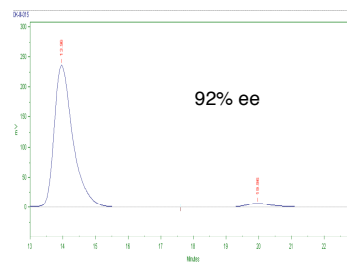

asymmetric reaction with iodide catalyst

### Tetrahydro-2-(*E*)-styryl-6-vinyl-2*H*-pyran (**23**).

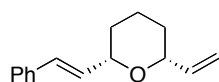

General procedure A was followed with substrate **22** to afford a colourless oil after silica gel chromatography (3:1 Hex: $\text{CH}_2\text{Cl}_2$ ,  $R_f$  = 0.10). IR (neat): 2935 (m), 2855 (w), 1495 (w), 1304 (w), 1198 (w), 1073 (m), 965 (m), 746 (m), 693 (m).  $^1\text{H}$  NMR (400 MHz,  $\text{CDCl}_3$ ):  $\delta$  7.40–7.35 (m, 2H), 7.31–7.18 (m, 3H), 6.61 (dd,  $J$  = 15.9, 1.1 Hz, 1H), 6.25 (dd,  $J$  = 15.9, 6.0 Hz, 1H), 5.93 (ddd,  $J$  = 17.4, 10.6, 5.5 Hz, 1H), 5.29 (ddd,  $J$  = 17.4, 1.5, 1.5 Hz, 1H), 5.12 (ddd,  $J$  = 10.6, 1.5, 1.5 Hz, 1H), 4.11–4.04 (m, 1H), 3.98–3.91 (m, 1H), 1.98–1.89 (m, 1H), 1.77–1.58 (m, 3H), 1.55–1.30 (m, 2H).  $^{13}\text{C}$  NMR (100 MHz,  $\text{CDCl}_3$ ):  $\delta$  139.48, 137.22, 130.95, 130.03, 128.61, 127.55, 126.61, 114.96, 78.53, 78.24, 31.77, 31.32, 23.61. HRMS Calcd for  $\text{C}_{15}\text{H}_{18}\text{O}$ : 214.1358. Found: 214.1358.

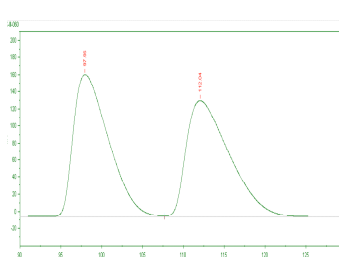

authentic racemic

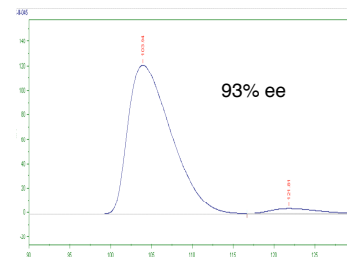

asymmetric reaction with chloride catalyst

conditions: 99.9:0.1 Hex:iPA, Chiralcel OJ,  
0.2 mL/min, 254 nm  
Retention Times: 98.0 min, 112.0 min

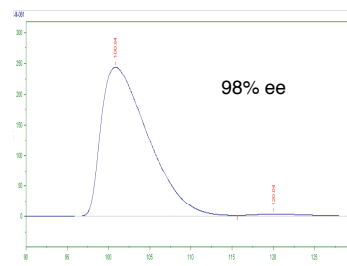

asymmetric reaction with iodide catalyst

**Tetrahydro-4-methyldene-2-(*E*)-styryl-6-vinyl-2*H*-pyran (25).**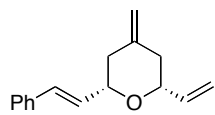

General procedure A was followed with **24** to afford a colorless oil after silica gel chromatography (3:1 Hex:CH<sub>2</sub>Cl<sub>2</sub>, *R<sub>f</sub>* = 0.15). IR (neat): 3025 (m), 2941 (m), 1653 (m), 1449 (m), 1309 (m), 1061 (s), 893 (m), 747 (s), 693 (s). <sup>1</sup>H NMR (400 MHz, CDCl<sub>3</sub>):  $\delta$  7.42–7.19 (m, 5H), 6.63 (d, *J* = 15.9 Hz, 1H), 6.27 (d, *J* = 15.9, 6.0 Hz, 1H), 5.95 (ddd, *J* = 17.4, 10.4, 6.0 Hz, 1H), 5.37–5.29 (m, 1H), 5.21–5.14 (m, 1H), 4.82 (d, *J* = 1.7 Hz, 1H), 4.82 (d, *J* = 1.7 Hz, 1H), 4.08–4.00 (m, 1H), 3.95–3.85 (m, 1H), 2.41–2.28 (m, 2H), 2.24–2.07 (m, 2H). <sup>13</sup>C NMR (100 MHz, CDCl<sub>3</sub>):  $\delta$  143.82, 138.67, 136.96, 130.78, 130.00, 128.65, 127.75, 126.67, 115.71, 109.48, 79.11, 78.90, 40.96, 40.51. HRMS Calcd for C<sub>16</sub>H<sub>18</sub>O: 226.1358. Found: 226.1352.

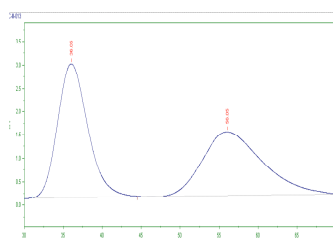

authentic racemic

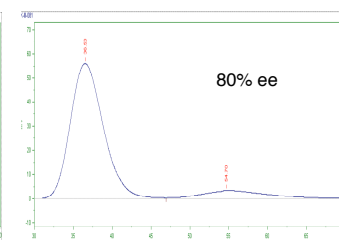

asymmetric reaction with chloride catalyst

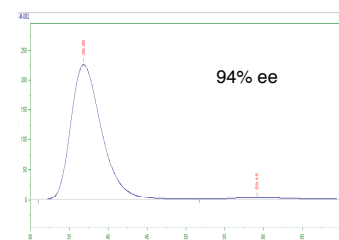

asymmetric reaction with iodide catalyst

conditions: 99.8:0.2 Hex:iPA,  
Chiralcel OB-H, 0.5 mL/min, 254 nm  
Retention Times: 36.1 min, 56.1 min

**Tetrahydro-4-iodo-2-(*E*)-styryl-6-vinyl-2*H*-pyran (27).**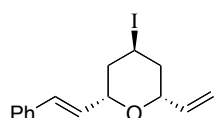

General procedure A was followed with substrate **26** to afford a colorless solid (mp 69.0–70.0 °C, pentane) after silica gel chromatography (3:1 Hex:CH<sub>2</sub>Cl<sub>2</sub>, *R<sub>f</sub>* = 0.10). IR (neat): 3024 (m), 2949 (m), 2888 (m), 1495 (m), 1412 (m), 1308 (m), 1236 (m), 1057 (s), 965 (m), 746 (s), 692 (s). <sup>1</sup>H NMR (400 MHz, CDCl<sub>3</sub>):  $\delta$  7.42–7.20 (m, 5H), 6.66 (d, *J* = 16.1 Hz, 1H), 6.25 (dd, *J* = 16.1, 5.9 Hz, 1H), 5.94 (ddd, *J* = 17.4, 10.6, 5.5 Hz, 1H), 5.35 (ddd, *J* = 17.4, 1.5, 1.5 Hz, 1H), 5.19 (ddd, *J* = 10.6, 1.5, 1.5 Hz, 1H), 4.92 (dddd, *J* =

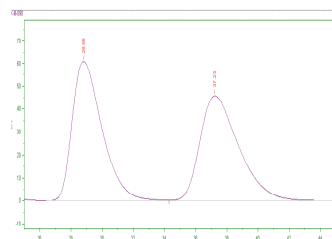

authentic racemic

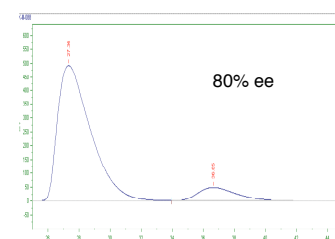

asymmetric reaction with chloride catalyst

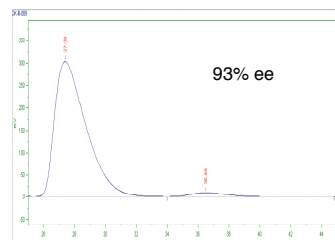

asymmetric reaction with iodide catalyst

conditions: 99.8:0.2 Hex:iPA, Chiralcel OJ,  
1.0 mL/min, 254 nm  
Retention Times: 28.8 min, 37.2 min



3.1, 3.1, 3.1, 3.1 Hz, 1H), 4.64–4.55 (m, 1H), 4.51–4.43 (m, 1H), 2.13 (dddd,  $J = 14.7$ , 2.2, 2.2, 2.2 Hz, 1H), 2.09 (dddd,  $J = 14.7$ , 2.2, 2.2, 2.2 Hz, 1H), 1.71 (ddd,  $J = 14.7$ , 10.6, 3.7 Hz, 1H), 1.65 (ddd,  $J = 14.7$ , 10.6, 3.7 Hz, 1H).  $^{13}\text{C}$  NMR (100 MHz,  $\text{CDCl}_3$ ):  $\delta$  137.84, 136.84, 131.10, 129.12, 128.67, 127.82, 126.65, 116.06, 74.31, 74.16, 40.68, 40.24, 29.59. HRMS Calcd for  $\text{C}_{15}\text{H}_{17}\text{IO}$ : 340.0324. Found: 340.0326.

**(2*S*,4*R*,6*R*)-Tetrahydro-4-(triisopropylsilyloxy)-2-(*E*)-styryl-6-vinyl-2*H*-pyran.**

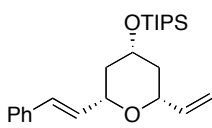 2,6-Lutidine (15  $\mu\text{L}$ , 0.12 mmol, 2.5 equiv) was added to a solution of alcohol **4a** (12 mg, 51  $\mu\text{mol}$ ) in  $\text{CH}_2\text{Cl}_2$  (0.5 mL) followed by triisopropylsilyl trifluoromethanesulfonate (21  $\mu\text{L}$ , 78  $\mu\text{mol}$ , 1.5 equiv) at  $-78^\circ\text{C}$ . After stirring for 2 h, the reaction mixture was treated with saturated aqueous  $\text{NaHCO}_3$ , warmed to  $22^\circ\text{C}$ , and the organic phase was separated. The aqueous layer was extracted with EtOAc, and the combined organic layers were washed with brine, dried ( $\text{MgSO}_4$ ), filtered, and concentrated to dryness. Silica gel chromatography of the residue (50:1 Hex:Et<sub>2</sub>O) afforded silyl ether (17 mg, 45  $\mu\text{mol}$ , 88%) as a colourless oil. IR (neat): 2943 (m), 2866 (m), 1463 (m), 1381 (m), 1125 (m), 1068 (m), 964 (m), 883 (m), 691 (m).  $^1\text{H}$  NMR (400 MHz,  $\text{CDCl}_3$ ):  $\delta$  7.41–7.19 (m, 5H), 6.61 (d,  $J = 16.1$  Hz, 1H), 6.25 (dd,  $J = 16.1$ , 6.0 Hz, 1H), 5.93 (ddd,  $J = 17.2$ , 10.4, 5.9 Hz, 1H), 5.31 (ddd,  $J = 17.2$ , 1.3, 1.3 Hz, 1H), 5.15 (ddd,  $J = 10.4$ , 1.3, 1.3 Hz, 1H), 4.10–3.88 (m, 3H), 2.03 (dddd,  $J = 12.6$ , 4.6, 2.0, 2.0 Hz, 1H), 1.99 (dddd,  $J = 12.6$ , 4.6, 2.0, 2.0 Hz, 1H), 1.47 (ddd,  $J = 11.7$ , 11.7, 11.7 Hz, 1H), 1.41 (ddd,  $J = 11.7$ , 11.7, 11.7 Hz, 1H), 1.18–1.10 (m, 21H).  $^{13}\text{C}$  NMR (100 MHz,  $\text{CDCl}_3$ ):  $\delta$  138.57, 136.99, 130.60, 129.91, 128.63, 127.71, 126.65, 115.52, 76.56, 76.30, 68.74, 42.01, 41.59, 18.25, 12.51. HRMS Calcd for  $\text{C}_{24}\text{H}_{38}\text{O}_2\text{Si}$ : 386.2641. Found: 386.2639.

**(2*R*,4*R*,6*S*)-Tetrahydro-2-(2-hydroxyethyl)-4-(triisopropylsilyloxy)-6-(*E*)-styryl-2*H*-pyran.**

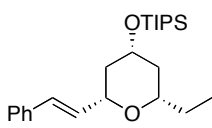 A solution of diene (37.5 mg, 97.0  $\mu\text{mol}$ ) in THF (1.0 mL) was added to a solution of 9-BBN (14.5 mg, 0.119 mmol, 1.2 equiv) in THF (1.0 mL) at  $0^\circ\text{C}$ . After stirring at  $22^\circ\text{C}$  for 3 h, the reaction mixture was cooled to  $0^\circ\text{C}$ . EtOH/THF (1:1, 0.2 mL), pH 7.00 buffer (Fisher; 0.05 M potassium phosphate monobasic/sodium hydroxide, 0.2 mL), and then 30%  $\text{H}_2\text{O}_2$  (0.2 mL) were added successively, and the mixture was stirred at  $22^\circ\text{C}$  for 12 h. The reaction mixture was diluted with brine (1 mL) and extracted with EtOAc (5 mL x 3). The combined organic layers were dried, filtered, and concentrated. The residue was purified by silica gel chromatography (9:1 Hex:EtOAc,  $R_f = 0.18$ ) to give the alcohol (33.3 mg,

82.3  $\mu$ mol, 85%) as a colorless oil. IR (neat): 3414 (br), 2943 (m), 2866 (m), 1462 (m), 1384 (m), 1248 (m), 1085 (m), 883 (m), 690 (m).  $^1\text{H}$  NMR (400 MHz,  $\text{CDCl}_3$ ):  $\delta$  7.40–7.20 (m, 5H), 6.56 (d,  $J$  = 15.9 Hz, 1H), 6.20 (dd,  $J$  = 15.9, 6.0 Hz, 1H), 4.06–3.90 (m, 2H), 3.90–3.72 (m, 3H), 3.72–3.62 (m, 1H), 2.06–1.98 (m, 1H), 1.94–1.36 (m, 5H), 1.16–0.98 (m, 21H).  $^{13}\text{C}$  NMR (100 MHz,  $\text{CDCl}_3$ ):  $\delta$  136.66, 130.82, 129.42, 128.65, 127.86, 126.65, 76.78, 72.83, 68.39, 61.68, 41.95, 41.75, 37.64, 34.60, 18.21, 12.45.

**(2*S*,4*R*,6*R*)-Tetrahydro-4-(triisopropylsilyloxy)-2-[2-(4-methoxybenzyloxy)ethyl]-6-(*E*)-styryl-2*H*-pyran (27).**

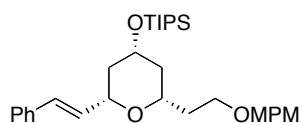

A solution of the alcohol (165 mg, 0.408 mmol) in THF (1.0 mL) was added to a suspension of  $\text{KO}^t\text{-Bu}$  (95.0 mg, 0.846 mmol, 2.0 equiv) in THF (3.0 mL) at 0  $^\circ\text{C}$ . After stirred at 22  $^\circ\text{C}$  for 30 min, the reaction mixture was recooled to 0  $^\circ\text{C}$ , and  $\text{MPMCl}$  (85  $\mu\text{L}$ , 0.63 mmol, 1.5 equiv) was added. The mixture was warmed to 22  $^\circ\text{C}$  and stirred for an additional 24 h. The mixture was diluted with saturated  $\text{NH}_4\text{Cl}$  solution (1 mL) and water (5 mL). The mixture was extracted with  $\text{EtOAc}$  (10 mL x 3) and the combined organic layers were washed with brine (10 mL), dried, filtered, and concentrated to dryness. The residue was purified by silica gel chromatography (15:1 Hex: $\text{Et}_2\text{O}$ ,  $R_f$  = 0.10) to afford  $\text{MPM}$  ether **27** (160 mg, 0.305 mmol, 75%) as a colorless oil. IR (neat): 2943 (m), 2865 (m), 1612 (m), 1513 (m), 1248 (m), 1091 (m), 821 (m), 685 (m).  $^1\text{H}$  NMR (400 MHz,  $\text{CDCl}_3$ ):  $\delta$  7.39 (d,  $J$  = 8.3 Hz, 2H), 7.33–7.19 (m, 5H), 6.89–6.83 (m, 2H), 6.57 (d,  $J$  = 15.9 Hz, 1H), 6.21 (dd,  $J$  = 15.9, 5.9 Hz, 1H), 4.47 and 4.43 (ABq,  $J$  = 11.7 Hz), 4.00–3.89 (m, 2H), 3.76 (s, 3H), 3.65 (ddd,  $J$  = 9.2, 8.2, 5.5 Hz, 1H), 3.62–3.53 (m, 1H), 3.56 (ddd,  $J$  = 9.2, 5.7, 5.7 Hz, 1H), 2.30–1.75 (m, 4H), 1.42 (ddd,  $J$  = 11.7, 11.7, 11.7 Hz), 1.30 (ddd,  $J$  = 11.7, 11.7, 11.7 Hz), 1.13–1.00 (m, 21H).  $^{13}\text{C}$  NMR (100 MHz,  $\text{CDCl}_3$ ):  $\delta$  138.46, 136.88, 130.80, 129.75, 128.65, 127.78, 126.65, 115.71, 75.91, 75.67, 69.40, 46.24, 45.83, 26.01. HRMS Calcd for  $\text{C}_{32}\text{H}_{48}\text{O}_4\text{Si}$ : 524.3322. Found: 524.3324.

**•Proof of Stereochemistry:** The absolute stereochemical identity of products obtained in this study have been determined by conversion of **4a** to known compound **28**.<sup>2</sup> The stereochemistry of other compounds has been determined by their conversion to **4a**.

**(2*S*,4*R*,6*R*)-Tetrahydro-2-hydroxymethyl-4-(triisopropylsilyloxy)-6-[2-(4-methoxybenzyloxy)ethyl]-2*H*-pyran (**28**).**

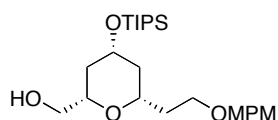

To a solution of olefin **27** (20.2 mg, 38.5  $\mu$ mol) in THF (0.5 mL) were added water (0.5 mL), NaIO<sub>4</sub> (120 mg, 0.561 mmol, 15 equiv), and a solution of OsO<sub>4</sub> (2.5 wt% in *t*-BuOH, 20.0 mg 1.97  $\mu$ mol) in *t*-BuOH (0.5 mL) at 0 °C. The reaction mixture was stirred at 22 °C for 12 h. The mixture was diluted with water (3 mL) and extracted with EtOAc (5 mL x 3). The combined organic layers were washed with brine (5 mL), dried, filtered, and concentrated to provide the crude aldehyde. A solution of NaBH<sub>4</sub> (3.5 mg, 93  $\mu$ mol) in methanol (0.5 mL) was added to a solution of the aldehyde in methanol (0.5 mL) at 0 °C. After being stirred at 22 °C for 30 min, the methanol was evaporated and the residue was diluted with water (1 mL) and extracted with EtOAc (3 mL x 3). The combined extracts were washed with brine, dried over MgSO<sub>4</sub>, filtered and concentrated to dryness. Silica gel chromatography of the residue (Hex:EtOAc 4:1, *R<sub>f</sub>* = 0.10) afforded alcohol **28** (10.1 mg, 22.3  $\mu$ mol, 58%) as a colorless oil.  $[\alpha]_D^{25}$  -7.10° (*c* 1.36, CHCl<sub>3</sub>) [lit.<sup>2</sup>  $[\alpha]_D^{22}$  -7.7° (*c* 1.32, CHCl<sub>3</sub>)]. IR (neat): 3458 (br), 2942 (s), 1514 (m), 1248 (m), 1093 (m), 883 (m), 820(m), 681 (m). <sup>1</sup>H NMR (400 MHz, CDCl<sub>3</sub>):  $\delta$  7.25 (d, *J* = 8.8 Hz, 2H), 6.88 (d, *J* = 8.8 Hz, 1H), 4.45 and 4.41 (ABq, *J* = 11.7 Hz, 2H), 3.89 (dddd, *J* = 10.8, 10.8, 4.9, 4.9 Hz, 1H), 3.80 (s, 3H), 3.63–3.38 (m, 6H), 2.00–1.71 (m, 4H), 1.95 (br, 1H), 1.34–1.17 (m, 2H), 1.10–0.95 (m, 21H). <sup>13</sup>C NMR (100 MHz, CDCl<sub>3</sub>):  $\delta$  159.34, 130.71, 129.40, 113.96, 76.08, 72.87, 72.80, 68.61, 66.42, 66.28, 55.43, 42.20, 37.71, 36.37, 18.22, 12.47. HRMS Calcd for C<sub>25</sub>H<sub>44</sub>O<sub>5</sub>Si: 452.2958. Found: 452.2958.

**General procedure for reductive ring-opening of pyran.** A 2-neck 25 mL round bottom flask equipped with a Dewar condenser was cooled to -78 °C. UHP ammonia (3 mL) was condensed into the flask. Sodium (22.0 mg, 0.957 mmol) was added under a stream of nitrogen; the ammonia solution immediately turns deep blue, stirring was continued until all of the sodium dissolved. Substrate **33** (6.1 mg, 18  $\mu$ mol) was added by cannula as a solution in Et<sub>2</sub>O (0.3 mL) and *t*-BuOH (77.5 mg, 1.05 mmol). The reaction was quenched after one minute by adding solid NH<sub>4</sub>Cl until the blue color disappears; 5 mL of CH<sub>2</sub>Cl<sub>2</sub> was then added and the ammonia was allowed to evaporate. The reaction was diluted with 10 mL of H<sub>2</sub>O and extracted with 10 mL portions of CH<sub>2</sub>Cl<sub>2</sub> until no diol remained in the aqueous layer by TLC. The combined organic layers were dried over

MgSO<sub>4</sub>, filtered, and the solvent removed *in vacuo* to deliver pure **34** (3.5 mg, 78%) as a clear colourless oil.

**(2*R*,4*S*,6*R*)-2-Phenyl-6-(4-phenylbutyl)-1,3-dioxane-4-ethanol (29).**

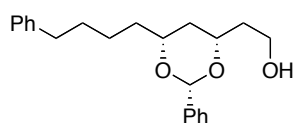

General procedure for reductive ring-opening of pyran was followed using **12** or **13** to yield a mixture of three products (*E/Z* isomers and over-reduction). It is imperative that a reaction time of one minute be employed to maximize the amount of desired product in the mixture: longer reaction times lead to a significant amount of reduction of the disubstituted olefin. This mixture was used without purification in the next step. A 25 mL flask was charged with the crude diol (214 mg, 0.921 mmol), benzaldehyde dimethylacetal (317 mg, 2.08 mmol), and a catalytic amount of *p*-toluenesulfonic acid (~ 10 mg). The flask was sparged with N<sub>2</sub> and benzene (8.0 mL) was added by syringe; the reaction was then allowed to stir for 1 h. The solvent was removed *in vacuo* and the reaction mixture was loaded directly onto a column of silica gel and eluted (24:1 Hex:Et<sub>2</sub>O) to deliver a mixture of three inseparable products ostensibly assigned to be *E/Z* isomers and over-reduction at the disubstituted olefin site (7:2:1 *E:Z:Saturated*). The mixture was used without further purification in the next reaction (The mixture is inconsequential in the context of this formal synthesis as the three products coalesce to a single compound after the hydrogenation step).

9-BBN (275 mg, 1.13 mmol) was dissolved in THF (4.5 mL) and added by cannula to a 25 mL flask containing a solution of the mixture of benzylidene acetals (see above) (270 mg, 0.842 mmol) in THF (4.5 mL) at 22 °C, and the mixture was stirred for 1 h. The reaction was cooled to 0 °C before adding pH 7 buffer (1.5 mL, 0.05 M) and 30% H<sub>2</sub>O<sub>2(aq)</sub> (1.5 mL); the mixture was then allowed to warm to 22 °C and stirred for an additional 12 h. The reaction mixture was diluted with H<sub>2</sub>O (30 mL) and extracted with CH<sub>2</sub>Cl<sub>2</sub> (4 x 30 mL). The combined organic extracts were washed with brine, dried over MgSO<sub>4</sub>, filtered, and the solvent was removed *in vacuo*. The crude mixture was purified by silica gel chromatography using gradient elution (4:1 → 2:1 Hex:Et<sub>2</sub>O) to deliver an inseparable mixture of three primary alcohols (192 mg, *R<sub>f</sub>* = 0.2, 67%). The mixture of alcohols (87.0 mg, 0.257 mmol) was transferred to a 10 mL flask and dissolved in absolute EtOH. 10% Pt(C) (8 mg) was added and the flask was sparged with UHP H<sub>2</sub> and then equipped with a balloon of H<sub>2</sub>. The mixture was stirred for 1 h at 22 °C and then filtered through celite with Et<sub>2</sub>O washings. The solvent was removed *in vacuo* to deliver pure **29** (86 mg, 0.25 mmol, 98%). IR (neat): 3415 (br), 3024 (w), 2924 (s), 2848 (m), 1451 (m), 1344 (m), 1130 (m), 1048 (m), 1023 (s), 752 (m), 702 (s). <sup>1</sup>H NMR (400 MHz,

CDCl<sub>3</sub>):  $\delta$  7.48–7.46 (m, 2H), 7.36–7.33 (m, 3H), 7.29–7.26 (m, 2H), 7.20–7.17 (m, 3H), 5.54 (s, 1H), 4.08 (dddd,  $J$  = 11.1, 8.4, 3.7, 3.7 Hz, 1H), 3.85–3.80 (m, 3H), 2.63 (t,  $J$  = 7.6 Hz, 2H), 2.14 (br, 1H), 1.91–1.82 (m, 2H), 1.74–1.43 (m, 10H). <sup>13</sup>C NMR (100 MHz, CDCl<sub>3</sub>):  $\delta$  142.71, 138.78, 128.81, 128.41, 128.38, 126.16, 125.80, 100.83, 76.96, 60.55, 38.21, 37.01, 35.97, 35.84, 31.54, 24.83. HRMS Calcd for C<sub>22</sub>H<sub>28</sub>O<sub>3</sub>Na: 363.1936. Found: 363.1935.

**(2*R*,4*R*,6*R*)-2-Phenyl-6-(4-phenylbutyl)-1,3-dioxane-4-acetaldehyde.**

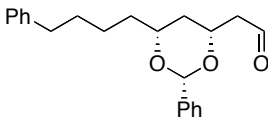 PCC (102 mg, 0.473 mmol), NaOAc (9.6 mg, 0.117 mmol), powdered flame-dried 4Å molecular sieves (120 mg) and celite (35 mg) were combined in a 25 mL flask and dissolved in CH<sub>2</sub>Cl<sub>2</sub> (1.0 mL). Alcohol **29** is added quantitatively by cannula using 4.0 mL of CH<sub>2</sub>Cl<sub>2</sub>. The reaction was allowed to stir for 2 h at 22 °C at which point Et<sub>2</sub>O (5.0 mL) was added, to precipitate chromium salts, and the mixture was stirred for an additional 10 min. The resulting mixture was filtered through a column (1" W) containing one inch of celite (top layer) and one inch of silica gel (bottom layer). The aldehyde obtained was of sufficient purity (as judged by <sup>1</sup>H NMR analysis) for subsequent use. IR (neat): 3018 (w), 2924 (s), 2855 (m), 1728 (s), 1451 (m), 1344 (m), 1123 (m), 1029 (s), 759 (m), 696 (s). <sup>1</sup>H NMR (400 MHz, CDCl<sub>3</sub>):  $\delta$  9.86 (t,  $J$  = 1.9 Hz, 1H), 7.48–7.46 (m, 2H), 7.36–7.34 (m, 3H), 7.28–7.26 (m, 2H), 7.18–7.16 (m, 3H), 5.60 (s, 1H), 4.41–4.38 (m, 1H), 3.87–3.84 (m, 1H), 2.84–2.78 (ddd,  $J$  = 16.9, 7.3, 2.0 Hz, 1H), 2.65–2.58 (m, 3H), 1.74–1.42 (m, 8H). <sup>13</sup>C NMR (100 MHz, CDCl<sub>3</sub>):  $\delta$  200.64, 142.67, 138.49, 128.89, 128.54, 128.42, 128.35, 126.17, 125.82, 100.83, 76.77, 72.04, 49.59, 36.81, 35.96, 35.78, 31.53, 24.80.

**( $\alpha$ S,2*R*,4*S*,6*R*)-2-Phenyl-6-(4-phenylbutyl)- $\alpha$ -2-propenyl-1,3-dioxane-4-ethanol (**30**).**

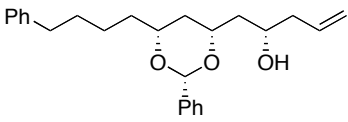  $\alpha$ -(–)-Methoxy isopinocampheylborane (8.0 mg, 25.3  $\mu$ mol) was dissolved in 0.25 mL of Et<sub>2</sub>O and cooled to 0 °C. A solution of allyl magnesium bromide (21.3  $\mu$ L, 0.95 M, 20.2  $\mu$ mol) was added by syringe and the resulting solution was stirred for 1 h. The solution was then cooled to –78 °C and the aldehyde (3.0 mg, 8.9  $\mu$ mol) was added dropwise by syringe. The mixture was allowed to stir at –78 °C for 2 h and then warmed to 0 °C. One drop each of 30% H<sub>2</sub>O<sub>2</sub>(aq) and 1N NaOH are added and the reaction was stirred at 22 °C for 3 h. The reaction was diluted with H<sub>2</sub>O (1 mL) and extracted with EtOAc (3 x 1 mL). The combined organic layers were dried over MgSO<sub>4</sub>, filtered and the solvent removed *in vacuo*. The crude reaction mixture was further purified by silica gel chromatography (9:1 hex:Et<sub>2</sub>O,  $R_f$  = 0.2) to deliver **31** as a clear colourless oil (2.8 mg, 82%) as a 3.5:1

mixture of diastereomers. This compound was identical to that already reported<sup>3</sup> as judged by <sup>1</sup>H and <sup>13</sup>C NMR.

#### 4-Benzyloxy-3,5-dimethyl-2-(*E*)-styryl-6-vinyltetrahydro-2*H*-pyran (**33**).

General procedure A was followed with substrate **32** using chloride catalyst **1a** and general procedure B was followed using iodide catalyst **1b** to afford a colorless oil after silica gel chromatography (19:1 □ 4:1 Hex:Et<sub>2</sub>O, R<sub>f</sub> = 0.3). IR (neat): 3062 (w), 3024 (w), 2974 (w), 2886 (m), 2836 (w), 1495 (w), 1451 (m), 1357 (w), 1092 (s), 1080 (m), 960 (s), 752 (s), 683 (s). <sup>1</sup>H NMR (400 MHz, CDCl<sub>3</sub>): □ 7.42–7.35 (m, 6H), 7.34–7.30 (m, 3H), 7.25–7.21 (m, 1H), 6.67 (d, *J* = 16.1 Hz, 1H), 6.23 (dd, *J* = 16.1, 5.4 Hz, 1H), 5.90 (ddd, *J* = 17.3, 10.7, 5.1 Hz, 1H), 5.38 (ddd, *J* = 17.3, 1.7, 1.7 Hz, 1H), 5.20 (ddd, *J* = 10.7, 1.6, 1.6 Hz, 1H), 4.59 (s, 2H), 4.17–4.15 (m, 1H), 4.05–4.03 (m, 1H), 3.75 (dd, *J* = 10.5, 10.5 Hz, 1H), 2.24–2.13 (m, 2H), 1.03 (d, *J* = 7.3 Hz, 3H), 1.01 (d, *J* = 7.3 Hz, 3H). <sup>13</sup>C NMR (100 MHz, CDCl<sub>3</sub>): □ 139.00, 137.29, 137.19, 130.11, 128.89, 128.63, 128.51, 127.56, 127.48, 127.39, 126.53, 115.22, 80.44, 80.07, 79.45, 69.26, 37.09, 36.57, 9.60, 9.37. HRMS Calcd for C<sub>24</sub>H<sub>28</sub>O<sub>2</sub>: 348.2089. Found: No molecular ion detected.

The ee of **34** was determined by HPLC of diol **35**, which is generated from **34** as described below.

#### (2*S*,3*R*,4*S*,5*S*)-4,6-Dimethyl-9-phenylnona-1,7-dien-3,5-diol (**34**).

General procedure for reductive ring-opening of pyrans was followed with **33** to deliver pure **34** as a clear colourless oil. IR (neat): 3345 (br), 2968 (m), 2905 (s), 1451 (s), 1111 (w), 973 (s), 916 (m), 746 (m), 696 (s). <sup>1</sup>H NMR (400 MHz, CDCl<sub>3</sub>): □ 7.36–7.26 (m, 2H), 7.24–7.15 (m, 3H), 5.91 (ddd, *J* = 17.1, 10.6, 5.3 Hz, 1H), 5.72 (ddd,

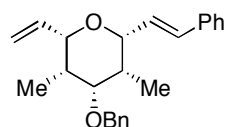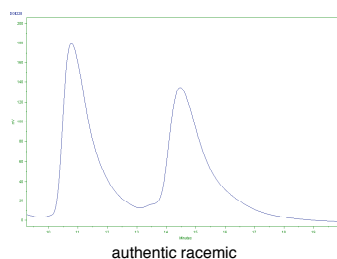

authentic racemic

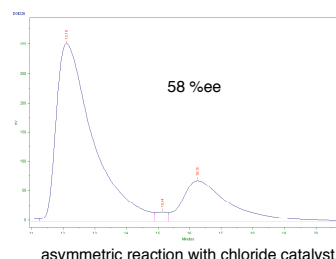

asymmetric reaction with chloride catalyst

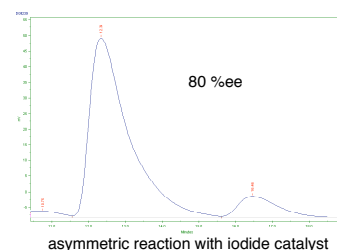

asymmetric reaction with iodide catalyst

Conditions: 95:5 Hex:IPA, Chiralcel AD,  
1.0 mL/min, 210 nm  
Retention Times: 12.1min, 16.3min

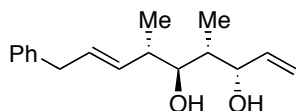

(3) Tosaki, S.; Nemoto, T.; Ohshima, T.; Shibasaki, M. *Org. Lett.* **2003**, *5*, 495–498.

$J = 15.3, 6.8, 6.8$  Hz, 1H), 5.51 (dd,  $J = 15.4, 8.5$  Hz, 1H), 5.30 (ddd,  $J = 17.2, 1.1, 1.1$  Hz, 1H), 5.19 (ddd,  $J = 10.6, 1.2, 1.2$  Hz, 1H), 4.50 (br s, 1H), 3.45–3.42 (m, 1H), 3.39 (d,  $J = 6.8$  Hz, 2H), 3.13 (d,  $J = 2.0$  Hz, 1H), 2.47–2.38 (m, 2H), 1.91–1.84 (m, 1H), 1.06 (d,  $J = 6.9$  Hz, 3H), 0.93 (d,  $J = 7.1$  Hz, 3H).  $^{13}\text{C}$  NMR (100 MHz,  $\text{CDCl}_3$ ):  $\delta$  140.62, 138.90, 132.45, 131.80, 128.64, 128.57, 126.23, 115.18, 78.77, 74.24, 40.39, 39.52, 39.31, 17.71, 11.98. HRMS Calcd for  $\text{C}_{17}\text{H}_{21}\text{O}_2$ [M-3H]: 257.1543. Found: [M-3H] 257.1542.

Table S1: Recycling studies using Chloride Catalyst 1a

| Cycle   | time (h);<br>conv (%) | yield (%) | <i>E:Z</i> | ee (%) | rec. cat.<br>yield (%) |
|---------|-----------------------|-----------|------------|--------|------------------------|
| Cycle 1 | 1; >98                | 80        | >98:2      | 94     | 90                     |
| Cycle 2 | 1; >98                | 75        | >98:2      | 93     | 85                     |
| Cycle 3 | 1; >98                | 78        | >98:2      | 94     | 88                     |
| Cycle 4 | 1.5; >98              | 78        | >98:2      | 94     | 80                     |
| Cycle 5 | 1.5; >98              | 72        | >98:2      | 94     | 67                     |

Table S2: Optimization of Allylation Reaction of Aldehyde 30.5

| $\text{MX}_2$             | Temp                  | Solvent                    | d.r (30:30b) |
|---------------------------|-----------------------|----------------------------|--------------|
| $\text{MgBr}_2$           | 0 °C $\rightarrow$ rt | THF/ $\text{Et}_2\text{O}$ | 1 : 1        |
| $\text{MgBr}_2$           | -78 °C                | THF/ $\text{Et}_2\text{O}$ | 1.3 : 1      |
| ( <i>R,R</i> )- <b>35</b> | -10 °C                | PhMe                       | 1 : 5        |
| ( <i>S,S</i> )- <b>35</b> | -10 °C                | PhMe                       | 1 : 1        |
| ( <i>S,S</i> )- <b>36</b> | -18 °C                | $\text{CH}_2\text{Cl}_2$   | 1 : 9        |
| ( <i>R,R</i> )- <b>36</b> | -18 °C                | $\text{CH}_2\text{Cl}_2$   | 1 : 1.2      |
| (+) <i>B</i> (lpc) $_2$   | -78 °C                | $\text{Et}_2\text{O}$      | 1 : 2.5      |
| (-) <i>B</i> (lpc) $_2$   | -78 °C                | $\text{Et}_2\text{O}$      | 3.5 : 1      |

**35**

**36**

Preparation of reagents **35**<sup>4</sup> and **36**<sup>5</sup> were completed as already reported with the exception that **36** was purified in a glovebox filled with  $\text{N}_2$ .

(4) Kinnaird, J. W.; Ng, P. Y.; Kubota, K.; Wang, X.; Leighton, J. L. *J. Am. Chem. Soc.* **2002**, 124, 7920–7921.

(5) Kubota, K.; Leighton, J. L. *Angew. Chem. Int. Ed.* **2003**, 42, 946–948.

### General experimental for X-Ray analysis

Data was collected using a Bruker APEX CCD (charged coupled device) based diffractometer equipped with an LT-2 low temperature apparatus operating at 193 K. A suitable crystal was chosen and mounted on a glass fiber using grease. Data was measured using omega scans of  $0.3^\circ$  per frame for 30 seconds, such that a hemisphere was collected. A total of 1305 frames were collected with a maximum resolution of  $0.90 \text{ \AA}$ . Cell parameters were retrieved using SMART<sup>6</sup> software and refined using SAINT on all observed reflections. Data reduction was performed using the SAINT software<sup>7</sup>, which corrects for  $L_p$  and decay. Absorption corrections were applied using SADABS supplied by George Sheldrick. The structures were solved by the direct method using the SHELXS-97<sup>8</sup> program and refined by least squares method on  $F^2$ , SHELXL-97<sup>9</sup>, incorporated in SHELXTL-PC V 6.10<sup>10</sup>.

All non-hydrogen atoms are refined anisotropically. Hydrogens were calculated by geometrical methods and refined as a riding model. The crystal used for the diffraction study showed no decomposition during data collection. All drawings are done at 30% ellipsoids.

### X-Ray Data for Iodide Complex 1b

**Table 1. Crystal data and structure refinement for DG01t**

|                      |                                                                    |
|----------------------|--------------------------------------------------------------------|
| Identification code  | dg01t                                                              |
| Empirical formula    | C <sub>48</sub> H <sub>43</sub> I N <sub>2</sub> O <sub>2</sub> Ru |
| Formula weight       | 907.81                                                             |
| Temperature          | 193(2) K                                                           |
| Wavelength           | $0.71073 \approx$                                                  |
| Crystal system       | Monoclinic                                                         |
| Space group          | P21                                                                |
| Unit cell dimensions | $a = 11.6174(7) \approx$ $a = 90^\circ$ .                          |

---

(6) SMART V5.626 (NT) Software for the CCD Detector Systems; Bruker Analytical X-ray Systems, Madison, WI (2001)

(7) SAINT V 5.01 (NT) Software for the CCD Detector Systems; Bruker Analytical X-ray Systems, Madison, WI (2001)

(8) Sheldrick, G. M. SHELXS-90, *Program for the Solution of Crystal Structure*, University of Göttingen, Germany, 1990

(9) Sheldrick, G. M. SHELXL-97, *Program for the Refinement of Crystal Structure*, University of Göttingen, Germany, 1997.

(10) SHELXTL 6.0 (PC-Version), Program Library for Structure Solution and Molecular Graphics; Bruker Analytical X-ray Systems, Madison, WI (1998)



|                                        |                                                              |                           |
|----------------------------------------|--------------------------------------------------------------|---------------------------|
|                                        | $b = 9.8883(6) \approx$                                      | $b = 92.5470(10)^\circ$ . |
|                                        | $c = 17.5221(11) \approx$                                    | $g = 90^\circ$ .          |
| Volume                                 | $2010.9(2) \approx^3$                                        |                           |
| Z                                      | 2                                                            |                           |
| Density (calculated)                   | $1.499 \text{ Mg/m}^3$                                       |                           |
| Absorption coefficient                 | $1.199 \text{ mm}^{-1}$                                      |                           |
| F(000)                                 | 916                                                          |                           |
| Crystal size                           | $0.5 \times 0.5 \times 0.5 \text{ mm}^3$                     |                           |
| Theta range for data collection        | $1.16 \text{ to } 28.29^\circ$ .                             |                           |
| Index ranges                           | $-11 \leq h \leq 15, -11 \leq k \leq 13, -20 \leq l \leq 23$ |                           |
| Reflections collected                  | 15089                                                        |                           |
| Independent reflections                | 9365 [R(int) = 0.0142]                                       |                           |
| Completeness to $\theta = 28.29^\circ$ | 99.6 %                                                       |                           |
| Refinement method                      | Full-matrix least-squares on $F^2$                           |                           |
| Data / restraints / parameters         | 9365 / 1 / 492                                               |                           |
| Goodness-of-fit on $F^2$               | 1.014                                                        |                           |
| Final R indices [ $I > 2\sigma(I)$ ]   | $R1 = 0.0219, wR2 = 0.0533$                                  |                           |
| R indices (all data)                   | $R1 = 0.0227, wR2 = 0.0537$                                  |                           |
| Absolute structure parameter           | -0.015(8)                                                    |                           |
| Largest diff. peak and hole            | $0.791 \text{ and } -0.230 \text{ e.} \approx^{-3}$          |                           |

**Table 2. Atomic coordinates ( $\times 10^4$ ) and equivalent isotropic displacement parameters ( $\approx^2 \times 10^3$ ) for DG01t.**

U(eq) is defined as one third of the trace of the orthogonalized  $U_{ij}$  tensor.

|       | x       | y       | z       | U(eq) |
|-------|---------|---------|---------|-------|
| Ru(1) | 2793(1) | 6397(1) | 7634(1) | 23(1) |
| I(2)  | 4673(1) | 4898(1) | 7879(1) | 36(1) |
| O(4)  | 4003(1) | 8151(2) | 7877(1) | 26(1) |
| C(5)  | -142(2) | 8112(2) | 6787(1) | 30(1) |
| C(6)  | 2394(2) | 4870(3) | 6100(1) | 24(1) |
| C(7)  | 2421(2) | 6433(3) | 5042(1) | 24(1) |
| C(8)  | 776(2)  | 6521(2) | 5948(1) | 24(1) |
| C(54) | 2430(2) | 6792(2) | 8618(1) | 29(1) |
| C(9)  | -299(2) | 6333(2) | 5543(1) | 24(1) |

|       |          |          |          |       |
|-------|----------|----------|----------|-------|
| C(10) | 1867(2)  | 5894(2)  | 5691(1)  | 24(1) |
| C(11) | -437(2)  | 5444(2)  | 4906(1)  | 28(1) |
| C(12) | 4046(2)  | 4906(3)  | 5314(1)  | 32(1) |
| C(13) | 5788(2)  | 9894(3)  | 8689(1)  | 29(1) |
| C(14) | 3955(2)  | 8510(2)  | 8645(1)  | 25(1) |
| C(15) | -2461(2) | 5945(3)  | 4783(2)  | 39(1) |
| C(16) | -272(2)  | 4929(3)  | 8708(1)  | 38(1) |
| C(17) | 3587(2)  | 7533(3)  | 3813(1)  | 40(1) |
| C(18) | 1917(2)  | 7456(2)  | 4573(1)  | 30(1) |
| C(19) | 4092(2)  | 6546(3)  | 4244(1)  | 35(1) |
| C(20) | 2914(2)  | 8149(3)  | 9788(1)  | 33(1) |
| C(21) | 3490(2)  | 4356(2)  | 5911(1)  | 30(1) |
| C(22) | 3076(2)  | 7838(2)  | 9018(1)  | 27(1) |
| C(23) | -1293(2) | 7043(2)  | 5775(1)  | 29(1) |
| C(24) | -1173(2) | 7964(3)  | 6397(1)  | 33(1) |
| C(25) | 3535(2)  | 5944(2)  | 4863(1)  | 28(1) |
| N(2)  | 1109(2)  | 4033(2)  | 7836(1)  | 35(1) |
| C(27) | 15(2)    | 4631(3)  | 10074(2) | 45(1) |
| C(28) | 756(2)   | 4236(3)  | 8607(1)  | 33(1) |
| C(29) | 858(2)   | 7378(2)  | 6578(1)  | 25(1) |
| C(30) | 4722(2)  | 9385(2)  | 9028(1)  | 28(1) |
| C(31) | 2479(2)  | 7999(3)  | 3974(1)  | 37(1) |
| C(32) | 6596(2)  | 8958(3)  | 8443(1)  | 36(1) |
| C(33) | -1492(2) | 5259(2)  | 4541(1)  | 35(1) |
| C(34) | 4291(2)  | 9173(2)  | 7300(1)  | 29(1) |
| C(35) | -2367(2) | 6824(3)  | 5386(1)  | 36(1) |
| C(36) | 1402(2)  | 3689(3)  | 9215(1)  | 38(1) |
| C(37) | 3407(2)  | 10294(3) | 7286(1)  | 40(1) |
| C(38) | 5999(2)  | 11265(3) | 8600(1)  | 41(1) |
| C(39) | 6966(3)  | 11693(3) | 8239(2)  | 52(1) |
| C(40) | 7567(2)  | 9402(3)  | 8090(2)  | 46(1) |
| C(41) | 1009(2)  | 3915(3)  | 9952(1)  | 44(1) |
| C(42) | 3601(2)  | 9109(3)  | 10159(1) | 37(1) |
| C(43) | 4504(2)  | 9703(3)  | 9789(1)  | 34(1) |
| C(44) | 7747(3)  | 10763(4) | 7984(2)  | 53(1) |
| C(45) | -617(2)  | 5133(3)  | 9454(2)  | 43(1) |

|       |         |         |          |       |
|-------|---------|---------|----------|-------|
| O(1)  | 1855(1) | 7638(2) | 6957(1)  | 27(1) |
| N(1)  | 1832(2) | 4257(2) | 6723(1)  | 26(1) |
| C(55) | 1818(2) | 4811(2) | 7433(1)  | 26(1) |
| C(50) | 4382(2) | 8396(3) | 6556(1)  | 36(1) |
| C(49) | -373(3) | 4868(5) | 10875(2) | 66(1) |
| C(52) | 991(3)  | 3183(3) | 6592(1)  | 46(1) |
| C(51) | 652(2)  | 2866(3) | 7403(1)  | 41(1) |
| C(48) | 2506(3) | 2924(4) | 9116(2)  | 52(1) |
| C(47) | -996(3) | 5485(4) | 8040(2)  | 57(1) |

---

**Table 3. Bond lengths [ $\approx$ ] and angles [ $\infty$ ] for DG01t.**

|             |            |
|-------------|------------|
| Ru(1)-C(54) | 1.835(2)   |
| Ru(1)-C(55) | 1.958(2)   |
| Ru(1)-O(1)  | 1.9974(15) |
| Ru(1)-O(4)  | 2.2603(15) |
| Ru(1)-I(2)  | 2.6583(2)  |
| O(4)-C(14)  | 1.395(2)   |
| O(4)-C(34)  | 1.479(3)   |
| C(5)-C(24)  | 1.360(3)   |
| C(5)-C(29)  | 1.432(3)   |
| C(5)-H(5)   | 0.9500     |
| C(6)-C(10)  | 1.369(3)   |
| C(6)-C(21)  | 1.424(3)   |
| C(6)-N(1)   | 1.432(3)   |
| C(7)-C(18)  | 1.414(3)   |
| C(7)-C(25)  | 1.429(3)   |
| C(7)-C(10)  | 1.434(3)   |
| C(8)-C(29)  | 1.392(3)   |
| C(8)-C(9)   | 1.421(3)   |
| C(8)-C(10)  | 1.498(3)   |
| C(54)-C(22) | 1.441(3)   |
| C(54)-H(54) | 0.9500     |
| C(9)-C(11)  | 1.423(3)   |
| C(9)-C(23)  | 1.427(3)   |
| C(11)-C(33) | 1.370(3)   |

|             |          |
|-------------|----------|
| C(11)-H(11) | 0.9500   |
| C(12)-C(21) | 1.366(3) |
| C(12)-C(25) | 1.409(3) |
| C(12)-H(12) | 0.9500   |
| C(13)-C(38) | 1.388(4) |
| C(13)-C(32) | 1.400(3) |
| C(13)-C(30) | 1.485(3) |
| C(14)-C(30) | 1.392(3) |
| C(14)-C(22) | 1.404(3) |
| C(15)-C(35) | 1.369(4) |
| C(15)-C(33) | 1.396(4) |
| C(15)-H(15) | 0.9500   |
| C(16)-C(28) | 1.395(4) |
| C(16)-C(45) | 1.399(3) |
| C(16)-C(47) | 1.514(4) |
| C(17)-C(19) | 1.352(4) |
| C(17)-C(31) | 1.407(4) |
| C(17)-H(17) | 0.9500   |
| C(18)-C(31) | 1.370(3) |
| C(18)-H(18) | 0.9500   |
| C(19)-C(25) | 1.419(3) |
| C(19)-H(19) | 0.9500   |
| C(20)-C(42) | 1.384(4) |
| C(20)-C(22) | 1.406(3) |
| C(20)-H(20) | 0.9500   |
| C(21)-H(21) | 0.9500   |
| C(23)-C(35) | 1.412(3) |
| C(23)-C(24) | 1.422(3) |
| C(24)-H(24) | 0.9500   |
| N(2)-C(55)  | 1.349(3) |
| N(2)-C(28)  | 1.443(3) |
| N(2)-C(51)  | 1.468(3) |
| C(27)-C(41) | 1.380(4) |
| C(27)-C(45) | 1.377(4) |
| C(27)-C(49) | 1.511(4) |
| C(28)-C(36) | 1.385(4) |

|              |          |
|--------------|----------|
| C(29)-O(1)   | 1.334(2) |
| C(30)-C(43)  | 1.404(3) |
| C(31)-H(31)  | 0.9500   |
| C(32)-C(40)  | 1.381(4) |
| C(32)-H(32)  | 0.9500   |
| C(33)-H(33)  | 0.9500   |
| C(34)-C(37)  | 1.511(4) |
| C(34)-C(50)  | 1.521(3) |
| C(34)-H(34)  | 1.0000   |
| C(35)-H(35)  | 0.9500   |
| C(36)-C(41)  | 1.407(3) |
| C(36)-C(48)  | 1.505(4) |
| C(37)-H(37A) | 0.9800   |
| C(37)-H(37B) | 0.9800   |
| C(37)-H(37C) | 0.9800   |
| C(38)-C(39)  | 1.379(4) |
| C(38)-H(38)  | 0.9500   |
| C(39)-C(44)  | 1.381(5) |
| C(39)-H(39)  | 0.9500   |
| C(40)-C(44)  | 1.376(5) |
| C(40)-H(40)  | 0.9500   |
| C(41)-H(41)  | 0.9500   |
| C(42)-C(43)  | 1.388(3) |
| C(42)-H(42)  | 0.9500   |
| C(43)-H(43)  | 0.9500   |
| C(44)-H(44)  | 0.9500   |
| C(45)-H(45)  | 0.9500   |
| N(1)-C(55)   | 1.360(3) |
| N(1)-C(52)   | 1.454(3) |
| C(50)-H(50A) | 0.9800   |
| C(50)-H(50B) | 0.9800   |
| C(50)-H(50C) | 0.9800   |
| C(49)-H(49A) | 0.9800   |
| C(49)-H(49B) | 0.9800   |
| C(49)-H(49C) | 0.9800   |
| C(52)-C(51)  | 1.523(3) |

|              |        |
|--------------|--------|
| C(52)-H(52A) | 0.9900 |
| C(52)-H(52B) | 0.9900 |
| C(51)-H(51A) | 0.9900 |
| C(51)-H(51B) | 0.9900 |
| C(48)-H(48A) | 0.9800 |
| C(48)-H(48B) | 0.9800 |
| C(48)-H(48C) | 0.9800 |
| C(47)-H(47A) | 0.9800 |
| C(47)-H(47B) | 0.9800 |
| C(47)-H(47C) | 0.9800 |

|                   |            |
|-------------------|------------|
| C(54)-Ru(1)-C(55) | 100.60(9)  |
| C(54)-Ru(1)-O(1)  | 106.61(8)  |
| C(55)-Ru(1)-O(1)  | 95.10(7)   |
| C(54)-Ru(1)-O(4)  | 80.04(8)   |
| C(55)-Ru(1)-O(4)  | 176.85(8)  |
| O(1)-Ru(1)-O(4)   | 87.65(6)   |
| C(54)-Ru(1)-I(2)  | 100.84(7)  |
| C(55)-Ru(1)-I(2)  | 92.70(6)   |
| O(1)-Ru(1)-I(2)   | 149.48(4)  |
| O(4)-Ru(1)-I(2)   | 84.15(4)   |
| C(14)-O(4)-C(34)  | 120.37(16) |
| C(14)-O(4)-Ru(1)  | 109.03(12) |
| C(34)-O(4)-Ru(1)  | 123.61(12) |
| C(24)-C(5)-C(29)  | 121.5(2)   |
| C(24)-C(5)-H(5)   | 119.2      |
| C(29)-C(5)-H(5)   | 119.2      |
| C(10)-C(6)-C(21)  | 121.77(19) |
| C(10)-C(6)-N(1)   | 120.23(18) |
| C(21)-C(6)-N(1)   | 118.0(2)   |
| C(18)-C(7)-C(25)  | 118.04(19) |
| C(18)-C(7)-C(10)  | 122.52(19) |
| C(25)-C(7)-C(10)  | 119.4(2)   |
| C(29)-C(8)-C(9)   | 120.26(18) |
| C(29)-C(8)-C(10)  | 117.45(18) |
| C(9)-C(8)-C(10)   | 122.17(18) |

|                   |            |
|-------------------|------------|
| C(22)-C(54)-Ru(1) | 118.21(15) |
| C(22)-C(54)-H(54) | 120.9      |
| Ru(1)-C(54)-H(54) | 120.9      |
| C(11)-C(9)-C(8)   | 122.51(19) |
| C(11)-C(9)-C(23)  | 117.67(19) |
| C(8)-C(9)-C(23)   | 119.82(19) |
| C(6)-C(10)-C(7)   | 118.89(19) |
| C(6)-C(10)-C(8)   | 120.92(18) |
| C(7)-C(10)-C(8)   | 120.02(19) |
| C(33)-C(11)-C(9)  | 121.0(2)   |
| C(33)-C(11)-H(11) | 119.5      |
| C(9)-C(11)-H(11)  | 119.5      |
| C(21)-C(12)-C(25) | 121.2(2)   |
| C(21)-C(12)-H(12) | 119.4      |
| C(25)-C(12)-H(12) | 119.4      |
| C(38)-C(13)-C(32) | 119.1(2)   |
| C(38)-C(13)-C(30) | 122.1(2)   |
| C(32)-C(13)-C(30) | 118.8(2)   |
| O(4)-C(14)-C(30)  | 124.83(18) |
| O(4)-C(14)-C(22)  | 112.89(18) |
| C(30)-C(14)-C(22) | 122.21(18) |
| C(35)-C(15)-C(33) | 120.4(2)   |
| C(35)-C(15)-H(15) | 119.8      |
| C(33)-C(15)-H(15) | 119.8      |
| C(28)-C(16)-C(45) | 118.2(2)   |
| C(28)-C(16)-C(47) | 122.0(2)   |
| C(45)-C(16)-C(47) | 119.8(2)   |
| C(19)-C(17)-C(31) | 120.2(2)   |
| C(19)-C(17)-H(17) | 119.9      |
| C(31)-C(17)-H(17) | 119.9      |
| C(31)-C(18)-C(7)  | 121.8(2)   |
| C(31)-C(18)-H(18) | 119.1      |
| C(7)-C(18)-H(18)  | 119.1      |
| C(17)-C(19)-C(25) | 121.9(2)   |
| C(17)-C(19)-H(19) | 119.1      |
| C(25)-C(19)-H(19) | 119.1      |

|                   |            |
|-------------------|------------|
| C(42)-C(20)-C(22) | 120.1(2)   |
| C(42)-C(20)-H(20) | 119.9      |
| C(22)-C(20)-H(20) | 119.9      |
| C(12)-C(21)-C(6)  | 119.6(2)   |
| C(12)-C(21)-H(21) | 120.2      |
| C(6)-C(21)-H(21)  | 120.2      |
| C(14)-C(22)-C(20) | 118.3(2)   |
| C(14)-C(22)-C(54) | 119.18(18) |
| C(20)-C(22)-C(54) | 122.4(2)   |
| C(35)-C(23)-C(24) | 121.6(2)   |
| C(35)-C(23)-C(9)  | 119.7(2)   |
| C(24)-C(23)-C(9)  | 118.75(19) |
| C(5)-C(24)-C(23)  | 120.6(2)   |
| C(5)-C(24)-H(24)  | 119.7      |
| C(23)-C(24)-H(24) | 119.7      |
| C(12)-C(25)-C(19) | 122.6(2)   |
| C(12)-C(25)-C(7)  | 119.1(2)   |
| C(19)-C(25)-C(7)  | 118.3(2)   |
| C(55)-N(2)-C(28)  | 128.0(2)   |
| C(55)-N(2)-C(51)  | 113.14(18) |
| C(28)-N(2)-C(51)  | 118.86(19) |
| C(41)-C(27)-C(45) | 118.9(2)   |
| C(41)-C(27)-C(49) | 120.6(3)   |
| C(45)-C(27)-C(49) | 120.5(3)   |
| C(36)-C(28)-C(16) | 122.1(2)   |
| C(36)-C(28)-N(2)  | 119.9(2)   |
| C(16)-C(28)-N(2)  | 117.9(2)   |
| O(1)-C(29)-C(8)   | 122.69(18) |
| O(1)-C(29)-C(5)   | 118.08(19) |
| C(8)-C(29)-C(5)   | 118.97(19) |
| C(14)-C(30)-C(43) | 117.3(2)   |
| C(14)-C(30)-C(13) | 123.01(19) |
| C(43)-C(30)-C(13) | 119.5(2)   |
| C(18)-C(31)-C(17) | 119.8(2)   |
| C(18)-C(31)-H(31) | 120.1      |
| C(17)-C(31)-H(31) | 120.1      |



|                     |            |
|---------------------|------------|
| C(40)-C(32)-C(13)   | 120.0(3)   |
| C(40)-C(32)-H(32)   | 120.0      |
| C(13)-C(32)-H(32)   | 120.0      |
| C(11)-C(33)-C(15)   | 120.7(2)   |
| C(11)-C(33)-H(33)   | 119.7      |
| C(15)-C(33)-H(33)   | 119.7      |
| O(4)-C(34)-C(37)    | 109.76(18) |
| O(4)-C(34)-C(50)    | 105.51(18) |
| C(37)-C(34)-C(50)   | 115.5(2)   |
| O(4)-C(34)-H(34)    | 108.6      |
| C(37)-C(34)-H(34)   | 108.6      |
| C(50)-C(34)-H(34)   | 108.6      |
| C(15)-C(35)-C(23)   | 120.6(2)   |
| C(15)-C(35)-H(35)   | 119.7      |
| C(23)-C(35)-H(35)   | 119.7      |
| C(28)-C(36)-C(41)   | 117.2(2)   |
| C(28)-C(36)-C(48)   | 122.9(2)   |
| C(41)-C(36)-C(48)   | 119.9(2)   |
| C(34)-C(37)-H(37A)  | 109.5      |
| C(34)-C(37)-H(37B)  | 109.5      |
| H(37A)-C(37)-H(37B) | 109.5      |
| C(34)-C(37)-H(37C)  | 109.5      |
| H(37A)-C(37)-H(37C) | 109.5      |
| H(37B)-C(37)-H(37C) | 109.5      |
| C(39)-C(38)-C(13)   | 120.2(3)   |
| C(39)-C(38)-H(38)   | 119.9      |
| C(13)-C(38)-H(38)   | 119.9      |
| C(38)-C(39)-C(44)   | 120.3(3)   |
| C(38)-C(39)-H(39)   | 119.9      |
| C(44)-C(39)-H(39)   | 119.9      |
| C(44)-C(40)-C(32)   | 120.2(3)   |
| C(44)-C(40)-H(40)   | 119.9      |
| C(32)-C(40)-H(40)   | 119.9      |
| C(27)-C(41)-C(36)   | 122.1(3)   |
| C(27)-C(41)-H(41)   | 118.9      |
| C(36)-C(41)-H(41)   | 118.9      |

|                     |            |
|---------------------|------------|
| C(20)-C(42)-C(43)   | 120.2(2)   |
| C(20)-C(42)-H(42)   | 119.9      |
| C(43)-C(42)-H(42)   | 119.9      |
| C(42)-C(43)-C(30)   | 121.4(2)   |
| C(42)-C(43)-H(43)   | 119.3      |
| C(30)-C(43)-H(43)   | 119.3      |
| C(40)-C(44)-C(39)   | 120.1(3)   |
| C(40)-C(44)-H(44)   | 120.0      |
| C(39)-C(44)-H(44)   | 120.0      |
| C(27)-C(45)-C(16)   | 121.4(3)   |
| C(27)-C(45)-H(45)   | 119.3      |
| C(16)-C(45)-H(45)   | 119.3      |
| C(29)-O(1)-Ru(1)    | 128.02(13) |
| C(55)-N(1)-C(6)     | 123.47(19) |
| C(55)-N(1)-C(52)    | 113.76(18) |
| C(6)-N(1)-C(52)     | 121.01(18) |
| N(2)-C(55)-N(1)     | 106.32(19) |
| N(2)-C(55)-Ru(1)    | 136.44(16) |
| N(1)-C(55)-Ru(1)    | 117.20(15) |
| C(34)-C(50)-H(50A)  | 109.5      |
| C(34)-C(50)-H(50B)  | 109.5      |
| H(50A)-C(50)-H(50B) | 109.5      |
| C(34)-C(50)-H(50C)  | 109.5      |
| H(50A)-C(50)-H(50C) | 109.5      |
| H(50B)-C(50)-H(50C) | 109.5      |
| C(27)-C(49)-H(49A)  | 109.5      |
| C(27)-C(49)-H(49B)  | 109.5      |
| H(49A)-C(49)-H(49B) | 109.5      |
| C(27)-C(49)-H(49C)  | 109.5      |
| H(49A)-C(49)-H(49C) | 109.5      |
| H(49B)-C(49)-H(49C) | 109.5      |
| N(1)-C(52)-C(51)    | 101.74(19) |
| N(1)-C(52)-H(52A)   | 111.4      |
| C(51)-C(52)-H(52A)  | 111.4      |
| N(1)-C(52)-H(52B)   | 111.4      |
| C(51)-C(52)-H(52B)  | 111.4      |

|                     |            |
|---------------------|------------|
| H(52A)-C(52)-H(52B) | 109.3      |
| N(2)-C(51)-C(52)    | 102.58(19) |
| N(2)-C(51)-H(51A)   | 111.3      |
| C(52)-C(51)-H(51A)  | 111.3      |
| N(2)-C(51)-H(51B)   | 111.3      |
| C(52)-C(51)-H(51B)  | 111.3      |
| H(51A)-C(51)-H(51B) | 109.2      |
| C(36)-C(48)-H(48A)  | 109.5      |
| C(36)-C(48)-H(48B)  | 109.5      |
| H(48A)-C(48)-H(48B) | 109.5      |
| C(36)-C(48)-H(48C)  | 109.5      |
| H(48A)-C(48)-H(48C) | 109.5      |
| H(48B)-C(48)-H(48C) | 109.5      |
| C(16)-C(47)-H(47A)  | 109.5      |
| C(16)-C(47)-H(47B)  | 109.5      |
| H(47A)-C(47)-H(47B) | 109.5      |
| C(16)-C(47)-H(47C)  | 109.5      |
| H(47A)-C(47)-H(47C) | 109.5      |
| H(47B)-C(47)-H(47C) | 109.5      |

**Table 4.** Anisotropic displacement parameters ( $\approx 2 \times 10^3$ ) for DG01t. The anisotropic displacement factor exponent takes the form:  $-2\pi^2 [h^2 a^{*2} U^{11} + \dots + 2 h k a^* b^* U^{12}]$

|       | U <sup>11</sup> | U <sup>22</sup> | U <sup>33</sup> | U <sup>23</sup> | U <sup>13</sup> | U <sup>12</sup> |
|-------|-----------------|-----------------|-----------------|-----------------|-----------------|-----------------|
| Ru(1) | 24(1)           | 25(1)           | 19(1)           | 0(1)            | 0(1)            | -2(1)           |
| I(2)  | 33(1)           | 39(1)           | 35(1)           | 2(1)            | -4(1)           | 7(1)            |
| O(4)  | 32(1)           | 29(1)           | 17(1)           | 0(1)            | 0(1)            | -4(1)           |
| C(5)  | 33(1)           | 33(1)           | 25(1)           | -6(1)           | 4(1)            | 4(1)            |
| C(6)  | 25(1)           | 26(1)           | 22(1)           | -3(1)           | 1(1)            | -3(1)           |
| C(7)  | 22(1)           | 26(1)           | 23(1)           | -6(1)           | 1(1)            | -2(1)           |
| C(8)  | 23(1)           | 27(1)           | 21(1)           | 1(1)            | 2(1)            | 1(1)            |
| C(54) | 28(1)           | 34(1)           | 24(1)           | 1(1)            | 3(1)            | -5(1)           |
| C(9)  | 23(1)           | 25(1)           | 23(1)           | 2(1)            | -1(1)           | 1(1)            |

|       |       |       |       |       |        |        |
|-------|-------|-------|-------|-------|--------|--------|
| C(10) | 23(1) | 26(1) | 22(1) | -6(1) | -1(1)  | 0(1)   |
| C(11) | 30(1) | 28(1) | 25(1) | 0(1)  | -2(1)  | 2(1)   |
| C(12) | 25(1) | 39(1) | 33(1) | -4(1) | 3(1)   | 7(1)   |
| C(13) | 29(1) | 37(1) | 22(1) | -4(1) | -5(1)  | -6(1)  |
| C(14) | 26(1) | 30(1) | 18(1) | -3(1) | -1(1)  | 1(1)   |
| C(15) | 28(1) | 49(2) | 39(1) | 4(1)  | -13(1) | -2(1)  |
| C(16) | 35(1) | 41(1) | 38(1) | 6(1)  | 4(1)   | -7(1)  |
| C(17) | 40(1) | 50(2) | 30(1) | 3(1)  | 11(1)  | -8(1)  |
| C(18) | 28(1) | 33(1) | 28(1) | 1(1)  | 4(1)   | 2(1)   |
| C(19) | 31(1) | 43(1) | 32(1) | -3(1) | 9(1)   | -2(1)  |
| C(20) | 32(1) | 46(2) | 20(1) | -2(1) | 4(1)   | -2(1)  |
| C(21) | 30(1) | 29(1) | 31(1) | -3(1) | -2(1)  | 6(1)   |
| C(22) | 28(1) | 32(1) | 21(1) | -2(1) | -1(1)  | 0(1)   |
| C(23) | 24(1) | 36(1) | 27(1) | 1(1)  | 1(1)   | 2(1)   |
| C(24) | 28(1) | 40(1) | 30(1) | -5(1) | 3(1)   | 9(1)   |
| C(25) | 23(1) | 34(1) | 28(1) | -6(1) | 1(1)   | -1(1)  |
| N(2)  | 42(1) | 34(1) | 29(1) | -1(1) | 5(1)   | -13(1) |
| C(27) | 41(1) | 61(2) | 33(1) | -6(1) | 6(1)   | -13(1) |
| C(28) | 36(1) | 34(1) | 29(1) | 2(1)  | 5(1)   | -10(1) |
| C(29) | 25(1) | 26(1) | 24(1) | 1(1)  | 1(1)   | 0(1)   |
| C(30) | 27(1) | 30(1) | 26(1) | -1(1) | -3(1)  | -1(1)  |
| C(31) | 39(1) | 41(1) | 31(1) | 7(1)  | 0(1)   | 1(1)   |
| C(32) | 33(1) | 42(1) | 31(1) | 0(1)  | -2(1)  | 0(1)   |
| C(33) | 38(1) | 34(1) | 32(1) | -1(1) | -7(1)  | -6(1)  |
| C(34) | 34(1) | 32(1) | 22(1) | 2(1)  | 0(1)   | -9(1)  |
| C(35) | 22(1) | 49(2) | 37(1) | 3(1)  | -2(1)  | 5(1)   |
| C(36) | 39(1) | 38(1) | 36(1) | 3(1)  | 7(1)   | -4(1)  |
| C(37) | 58(2) | 32(1) | 29(1) | 2(1)  | -6(1)  | 1(1)   |
| C(38) | 43(1) | 38(1) | 41(1) | -7(1) | -2(1)  | -8(1)  |
| C(39) | 56(2) | 47(2) | 53(2) | 2(1)  | 2(1)   | -19(1) |
| C(40) | 32(1) | 65(2) | 40(1) | -3(1) | 4(1)   | 1(1)   |
| C(41) | 41(1) | 61(2) | 29(1) | 3(1)  | 1(1)   | -8(1)  |
| C(42) | 40(1) | 49(2) | 23(1) | -6(1) | 1(1)   | 2(1)   |
| C(43) | 32(1) | 43(2) | 26(1) | -9(1) | -5(1)  | -1(1)  |
| C(44) | 38(1) | 79(2) | 44(2) | 7(1)  | 7(1)   | -17(1) |
| C(45) | 36(1) | 47(2) | 46(1) | -3(1) | 9(1)   | -6(1)  |

|       |       |        |       |        |       |        |
|-------|-------|--------|-------|--------|-------|--------|
| O(1)  | 28(1) | 27(1)  | 24(1) | 0(1)   | -4(1) | -3(1)  |
| N(1)  | 29(1) | 25(1)  | 24(1) | 0(1)   | -1(1) | -4(1)  |
| C(55) | 25(1) | 28(1)  | 24(1) | 2(1)   | 0(1)  | 2(1)   |
| C(50) | 44(1) | 42(1)  | 23(1) | 1(1)   | 6(1)  | -7(1)  |
| C(49) | 53(2) | 108(3) | 36(1) | -18(2) | 8(1)  | -13(2) |
| C(52) | 58(2) | 44(2)  | 36(1) | -11(1) | 8(1)  | -25(1) |
| C(51) | 50(2) | 37(1)  | 38(1) | -4(1)  | 4(1)  | -18(1) |
| C(48) | 47(2) | 62(2)  | 47(2) | 10(1)  | 7(1)  | 7(1)   |
| C(47) | 52(2) | 71(2)  | 48(2) | 19(2)  | 6(1)  | 9(2)   |

**Table 5. Hydrogen coordinates (  $\times 10^4$ ) and isotropic displacement parameters ( $\approx 2 \times 10^3$ ) for DG01t.**

|        | x     | y     | z     | U(eq) |
|--------|-------|-------|-------|-------|
| H(5)   | -84   | 8716  | 7209  | 36    |
| H(54)  | 1833  | 6319  | 8857  | 35    |
| H(11)  | 214   | 4971  | 4732  | 33    |
| H(12)  | 4789  | 4584  | 5201  | 39    |
| H(15)  | -3189 | 5800  | 4527  | 47    |
| H(17)  | 3980  | 7913  | 3401  | 48    |
| H(18)  | 1169  | 7776  | 4676  | 36    |
| H(19)  | 4843  | 6248  | 4129  | 42    |
| H(20)  | 2331  | 7700  | 10055 | 39    |
| H(21)  | 3833  | 3634  | 6197  | 36    |
| H(24)  | -1818 | 8481  | 6541  | 39    |
| H(31)  | 2122  | 8687  | 3668  | 45    |
| H(32)  | 6477  | 8018  | 8519  | 43    |
| H(33)  | -1566 | 4657  | 4119  | 42    |
| H(34)  | 5063  | 9567  | 7445  | 35    |
| H(35)  | -3031 | 7292  | 5543  | 44    |
| H(37A) | 2643  | 9918  | 7157  | 60    |
| H(37B) | 3601  | 10968 | 6901  | 60    |
| H(37C) | 3404  | 10725 | 7789  | 60    |
| H(38)  | 5477  | 11911 | 8788  | 49    |

|        |       |       |       |    |
|--------|-------|-------|-------|----|
| H(39)  | 7094  | 12632 | 8165  | 62 |
| H(40)  | 8112  | 8765  | 7921  | 55 |
| H(41)  | 1443  | 3563  | 10379 | 52 |
| H(42)  | 3454  | 9363  | 10669 | 45 |
| H(43)  | 4986  | 10337 | 10057 | 40 |
| H(44)  | 8410  | 11063 | 7734  | 64 |
| H(45)  | -1302 | 5629  | 9534  | 51 |
| H(50A) | 4837  | 7573  | 6650  | 54 |
| H(50B) | 4760  | 8963  | 6183  | 54 |
| H(50C) | 3609  | 8151  | 6356  | 54 |
| H(49A) | 49    | 5637  | 11102 | 98 |
| H(49B) | -218  | 4058  | 11185 | 98 |
| H(49C) | -1201 | 5062  | 10857 | 98 |
| H(52A) | 1338  | 2387  | 6349  | 55 |
| H(52B) | 321   | 3498  | 6272  | 55 |
| H(51A) | -195  | 2798  | 7433  | 49 |
| H(51B) | 1010  | 2012  | 7590  | 49 |
| H(48A) | 2494  | 2519  | 8605  | 78 |
| H(48B) | 2581  | 2210  | 9503  | 78 |
| H(48C) | 3160  | 3546  | 9176  | 78 |
| H(47A) | -498  | 5961  | 7691  | 86 |
| H(47B) | -1570 | 6114  | 8228  | 86 |
| H(47C) | -1388 | 4738  | 7767  | 86 |

---

**Table 6. Torsion angles [ $^{\circ}$ ] for DG01t.**

---

|                         |             |
|-------------------------|-------------|
| C(54)-Ru(1)-O(4)-C(14)  | 6.83(14)    |
| C(55)-Ru(1)-O(4)-C(14)  | -95.2(12)   |
| O(1)-Ru(1)-O(4)-C(14)   | 114.15(13)  |
| I(2)-Ru(1)-O(4)-C(14)   | -95.29(12)  |
| C(54)-Ru(1)-O(4)-C(34)  | -143.79(17) |
| C(55)-Ru(1)-O(4)-C(34)  | 114.1(12)   |
| O(1)-Ru(1)-O(4)-C(34)   | -36.47(15)  |
| I(2)-Ru(1)-O(4)-C(34)   | 114.10(15)  |
| C(55)-Ru(1)-C(54)-C(22) | 173.30(18)  |

|                         |             |
|-------------------------|-------------|
| O(1)-Ru(1)-C(54)-C(22)  | -88.06(19)  |
| O(4)-Ru(1)-C(54)-C(22)  | -3.56(17)   |
| I(2)-Ru(1)-C(54)-C(22)  | 78.45(18)   |
| C(29)-C(8)-C(9)-C(11)   | -178.5(2)   |
| C(10)-C(8)-C(9)-C(11)   | 5.7(3)      |
| C(29)-C(8)-C(9)-C(23)   | 1.1(3)      |
| C(10)-C(8)-C(9)-C(23)   | -174.8(2)   |
| C(21)-C(6)-C(10)-C(7)   | 1.8(3)      |
| N(1)-C(6)-C(10)-C(7)    | -176.36(19) |
| C(21)-C(6)-C(10)-C(8)   | -173.42(19) |
| N(1)-C(6)-C(10)-C(8)    | 8.4(3)      |
| C(18)-C(7)-C(10)-C(6)   | 177.7(2)    |
| C(25)-C(7)-C(10)-C(6)   | -3.4(3)     |
| C(18)-C(7)-C(10)-C(8)   | -7.0(3)     |
| C(25)-C(7)-C(10)-C(8)   | 171.9(2)    |
| C(29)-C(8)-C(10)-C(6)   | 73.6(3)     |
| C(9)-C(8)-C(10)-C(6)    | -110.4(2)   |
| C(29)-C(8)-C(10)-C(7)   | -101.6(2)   |
| C(9)-C(8)-C(10)-C(7)    | 74.3(3)     |
| C(8)-C(9)-C(11)-C(33)   | 178.2(2)    |
| C(23)-C(9)-C(11)-C(33)  | -1.3(3)     |
| C(34)-O(4)-C(14)-C(30)  | -39.9(3)    |
| Ru(1)-O(4)-C(14)-C(30)  | 168.36(19)  |
| C(34)-O(4)-C(14)-C(22)  | 143.28(19)  |
| Ru(1)-O(4)-C(14)-C(22)  | -8.5(2)     |
| C(25)-C(7)-C(18)-C(31)  | -1.6(4)     |
| C(10)-C(7)-C(18)-C(31)  | 177.3(2)    |
| C(31)-C(17)-C(19)-C(25) | 0.4(4)      |
| C(25)-C(12)-C(21)-C(6)  | -2.3(4)     |
| C(10)-C(6)-C(21)-C(12)  | 1.0(3)      |
| N(1)-C(6)-C(21)-C(12)   | 179.3(2)    |
| O(4)-C(14)-C(22)-C(20)  | -177.8(2)   |
| C(30)-C(14)-C(22)-C(20) | 5.3(3)      |
| O(4)-C(14)-C(22)-C(54)  | 6.5(3)      |
| C(30)-C(14)-C(22)-C(54) | -170.4(2)   |
| C(42)-C(20)-C(22)-C(14) | 0.8(4)      |

|                         |             |
|-------------------------|-------------|
| C(42)-C(20)-C(22)-C(54) | 176.3(2)    |
| Ru(1)-C(54)-C(22)-C(14) | -0.2(3)     |
| Ru(1)-C(54)-C(22)-C(20) | -175.66(18) |
| C(11)-C(9)-C(23)-C(35)  | 1.4(3)      |
| C(8)-C(9)-C(23)-C(35)   | -178.2(2)   |
| C(11)-C(9)-C(23)-C(24)  | -178.4(2)   |
| C(8)-C(9)-C(23)-C(24)   | 2.1(3)      |
| C(29)-C(5)-C(24)-C(23)  | 1.5(4)      |
| C(35)-C(23)-C(24)-C(5)  | 176.9(2)    |
| C(9)-C(23)-C(24)-C(5)   | -3.4(4)     |
| C(21)-C(12)-C(25)-C(19) | 179.4(2)    |
| C(21)-C(12)-C(25)-C(7)  | 0.7(4)      |
| C(17)-C(19)-C(25)-C(12) | 179.4(2)    |
| C(17)-C(19)-C(25)-C(7)  | -1.9(4)     |
| C(18)-C(7)-C(25)-C(12)  | -178.8(2)   |
| C(10)-C(7)-C(25)-C(12)  | 2.2(3)      |
| C(18)-C(7)-C(25)-C(19)  | 2.4(3)      |
| C(10)-C(7)-C(25)-C(19)  | -176.5(2)   |
| C(45)-C(16)-C(28)-C(36) | 3.6(4)      |
| C(47)-C(16)-C(28)-C(36) | -177.9(3)   |
| C(45)-C(16)-C(28)-N(2)  | -179.8(2)   |
| C(47)-C(16)-C(28)-N(2)  | -1.3(4)     |
| C(55)-N(2)-C(28)-C(36)  | -89.6(3)    |
| C(51)-N(2)-C(28)-C(36)  | 91.5(3)     |
| C(55)-N(2)-C(28)-C(16)  | 93.7(3)     |
| C(51)-N(2)-C(28)-C(16)  | -85.1(3)    |
| C(9)-C(8)-C(29)-O(1)    | -176.84(19) |
| C(10)-C(8)-C(29)-O(1)   | -0.8(3)     |
| C(9)-C(8)-C(29)-C(5)    | -2.9(3)     |
| C(10)-C(8)-C(29)-C(5)   | 173.1(2)    |
| C(24)-C(5)-C(29)-O(1)   | 175.8(2)    |
| C(24)-C(5)-C(29)-C(8)   | 1.6(3)      |
| O(4)-C(14)-C(30)-C(43)  | 176.1(2)    |
| C(22)-C(14)-C(30)-C(43) | -7.4(3)     |
| O(4)-C(14)-C(30)-C(13)  | -8.9(4)     |
| C(22)-C(14)-C(30)-C(13) | 167.6(2)    |



|                         |            |
|-------------------------|------------|
| C(38)-C(13)-C(30)-C(14) | 121.9(3)   |
| C(32)-C(13)-C(30)-C(14) | -57.2(3)   |
| C(38)-C(13)-C(30)-C(43) | -63.1(3)   |
| C(32)-C(13)-C(30)-C(43) | 117.7(2)   |
| C(7)-C(18)-C(31)-C(17)  | 0.1(4)     |
| C(19)-C(17)-C(31)-C(18) | 0.5(4)     |
| C(38)-C(13)-C(32)-C(40) | -2.5(3)    |
| C(30)-C(13)-C(32)-C(40) | 176.7(2)   |
| C(9)-C(11)-C(33)-C(15)  | 0.3(4)     |
| C(35)-C(15)-C(33)-C(11) | 0.6(4)     |
| C(14)-O(4)-C(34)-C(37)  | -60.7(2)   |
| Ru(1)-O(4)-C(34)-C(37)  | 86.80(19)  |
| C(14)-O(4)-C(34)-C(50)  | 174.32(18) |
| Ru(1)-O(4)-C(34)-C(50)  | -38.2(2)   |
| C(33)-C(15)-C(35)-C(23) | -0.5(4)    |
| C(24)-C(23)-C(35)-C(15) | 179.2(2)   |
| C(9)-C(23)-C(35)-C(15)  | -0.5(4)    |
| C(16)-C(28)-C(36)-C(41) | -3.1(4)    |
| N(2)-C(28)-C(36)-C(41)  | -179.6(2)  |
| C(16)-C(28)-C(36)-C(48) | 179.3(3)   |
| N(2)-C(28)-C(36)-C(48)  | 2.7(4)     |
| C(32)-C(13)-C(38)-C(39) | 3.2(3)     |
| C(30)-C(13)-C(38)-C(39) | -175.9(2)  |
| C(13)-C(38)-C(39)-C(44) | -2.0(4)    |
| C(13)-C(32)-C(40)-C(44) | 0.4(4)     |
| C(45)-C(27)-C(41)-C(36) | 0.4(4)     |
| C(49)-C(27)-C(41)-C(36) | -179.3(3)  |
| C(28)-C(36)-C(41)-C(27) | 1.0(4)     |
| C(48)-C(36)-C(41)-C(27) | 178.8(3)   |
| C(22)-C(20)-C(42)-C(43) | -4.4(4)    |
| C(20)-C(42)-C(43)-C(30) | 2.2(4)     |
| C(14)-C(30)-C(43)-C(42) | 3.6(4)     |
| C(13)-C(30)-C(43)-C(42) | -171.6(2)  |
| C(32)-C(40)-C(44)-C(39) | 0.9(5)     |
| C(38)-C(39)-C(44)-C(40) | -0.2(5)    |
| C(41)-C(27)-C(45)-C(16) | 0.1(4)     |

|                         |             |
|-------------------------|-------------|
| C(49)-C(27)-C(45)-C(16) | 179.8(3)    |
| C(28)-C(16)-C(45)-C(27) | -2.1(4)     |
| C(47)-C(16)-C(45)-C(27) | 179.4(3)    |
| C(8)-C(29)-O(1)-Ru(1)   | -70.7(3)    |
| C(5)-C(29)-O(1)-Ru(1)   | 115.3(2)    |
| C(54)-Ru(1)-O(1)-C(29)  | -97.75(17)  |
| C(55)-Ru(1)-O(1)-C(29)  | 4.92(17)    |
| O(4)-Ru(1)-O(1)-C(29)   | -176.63(16) |
| I(2)-Ru(1)-O(1)-C(29)   | 109.06(16)  |
| C(10)-C(6)-N(1)-C(55)   | -80.4(3)    |
| C(21)-C(6)-N(1)-C(55)   | 101.4(3)    |
| C(10)-C(6)-N(1)-C(52)   | 83.5(3)     |
| C(21)-C(6)-N(1)-C(52)   | -94.7(3)    |
| C(28)-N(2)-C(55)-N(1)   | -176.4(2)   |
| C(51)-N(2)-C(55)-N(1)   | 2.5(3)      |
| C(28)-N(2)-C(55)-Ru(1)  | 6.0(4)      |
| C(51)-N(2)-C(55)-Ru(1)  | -175.1(2)   |
| C(6)-N(1)-C(55)-N(2)    | 173.4(2)    |
| C(52)-N(1)-C(55)-N(2)   | 8.4(3)      |
| C(6)-N(1)-C(55)-Ru(1)   | -8.4(3)     |
| C(52)-N(1)-C(55)-Ru(1)  | -173.41(18) |
| C(54)-Ru(1)-C(55)-N(2)  | -4.9(3)     |
| O(1)-Ru(1)-C(55)-N(2)   | -112.9(2)   |
| O(4)-Ru(1)-C(55)-N(2)   | 96.6(12)    |
| I(2)-Ru(1)-C(55)-N(2)   | 96.6(2)     |
| C(54)-Ru(1)-C(55)-N(1)  | 177.61(17)  |
| O(1)-Ru(1)-C(55)-N(1)   | 69.63(17)   |
| O(4)-Ru(1)-C(55)-N(1)   | -80.9(13)   |
| I(2)-Ru(1)-C(55)-N(1)   | -80.84(16)  |
| C(55)-N(1)-C(52)-C(51)  | -14.9(3)    |
| C(6)-N(1)-C(52)-C(51)   | 179.7(2)    |
| C(55)-N(2)-C(51)-C(52)  | -11.4(3)    |
| C(28)-N(2)-C(51)-C(52)  | 167.6(2)    |
| N(1)-C(52)-C(51)-N(2)   | 14.6(3)     |

---
